# Supplementary material for: Blood collection tube and RNA purification method recommendations for extracellular RNA transcriptome profiling: A large-scale pre-analytical variable performance evaluation
Source: Research Square preprint supplement (doi:10.21203/rs.3.rs-2409038/v2), 2024-07-22
Supplement: Supplementary file 1 [file 011f1c103ba66c33829e7259.pdf]

Supplementary Fig. S13.

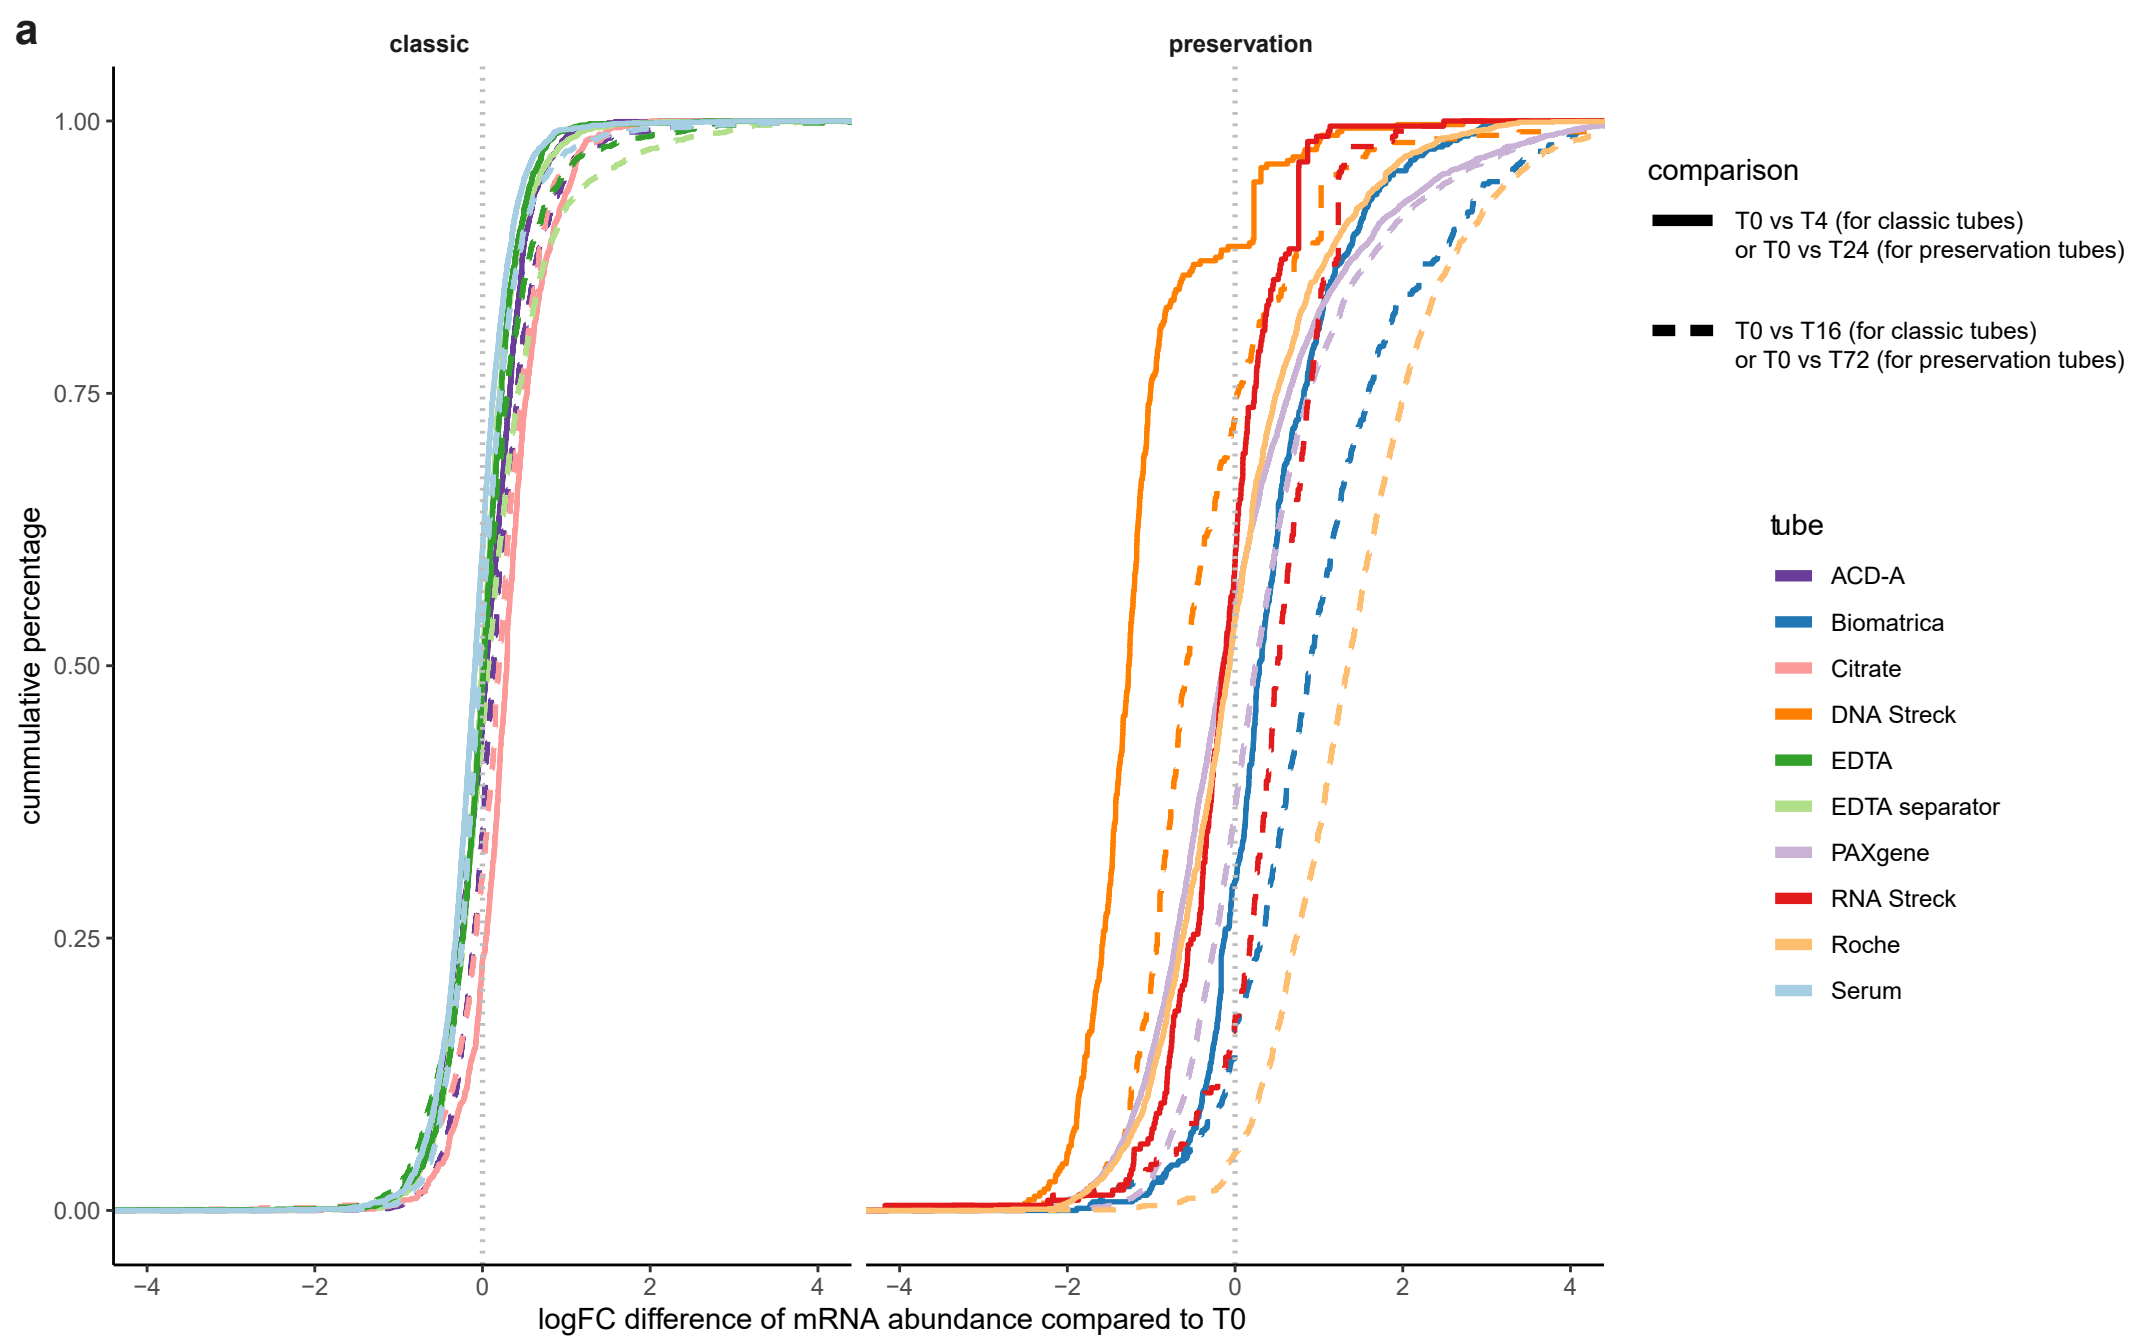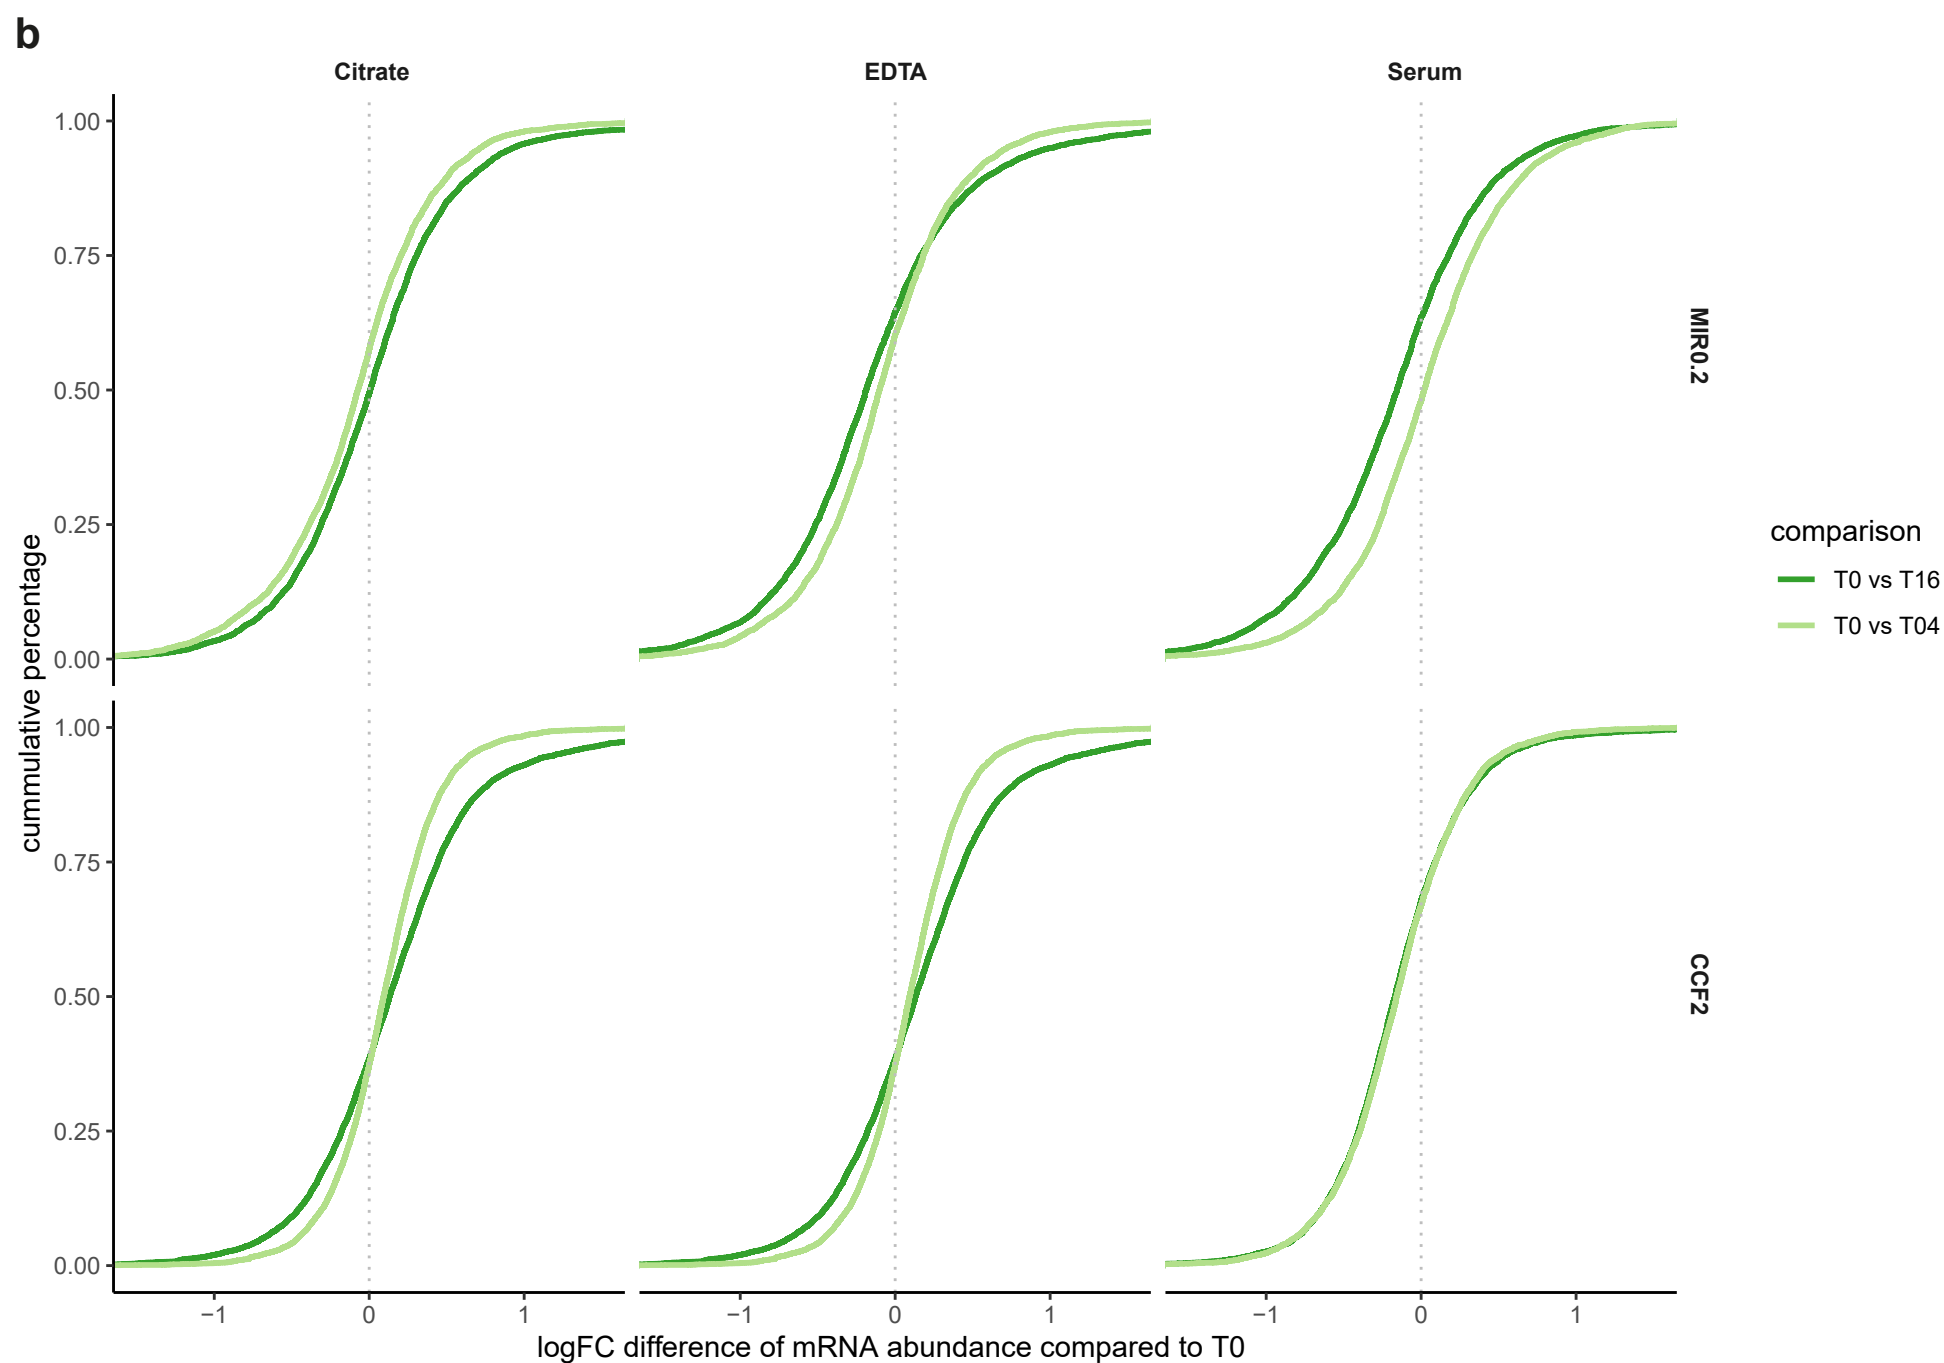

**Supplementary Fig. S13: RNA abundance levels differ across time intervals.** For each blood collection tube in exRNAQC phase 1 (a) and 2 (b), distributions of log<sub>2</sub> fold-changes of mRNA between immediate processing (T0) and the two subsequent time intervals are shown. LogFC differences close to 0 indicate good performance. T0=plasma prepared immediately after blood draw. T04, T16, T24, T72=plasma prepared 4, 16, 24 and 72 hours after blood draw, respectively. Note that different donors were sampled and that tubes were processed at different time intervals for *preservation* and classic tubes.
