# Supplementary material for: Blood collection tube and RNA purification method recommendations for extracellular RNA transcriptome profiling: A large-scale pre-analytical variable performance evaluation
Source: Research Square preprint supplement (doi:10.21203/rs.3.rs-2409038/v2), 2024-07-22
Supplement: Supplementary file 4 [file 2367d1d397284b0ae08ef581.pdf]

# Supplementary Fig. S12.

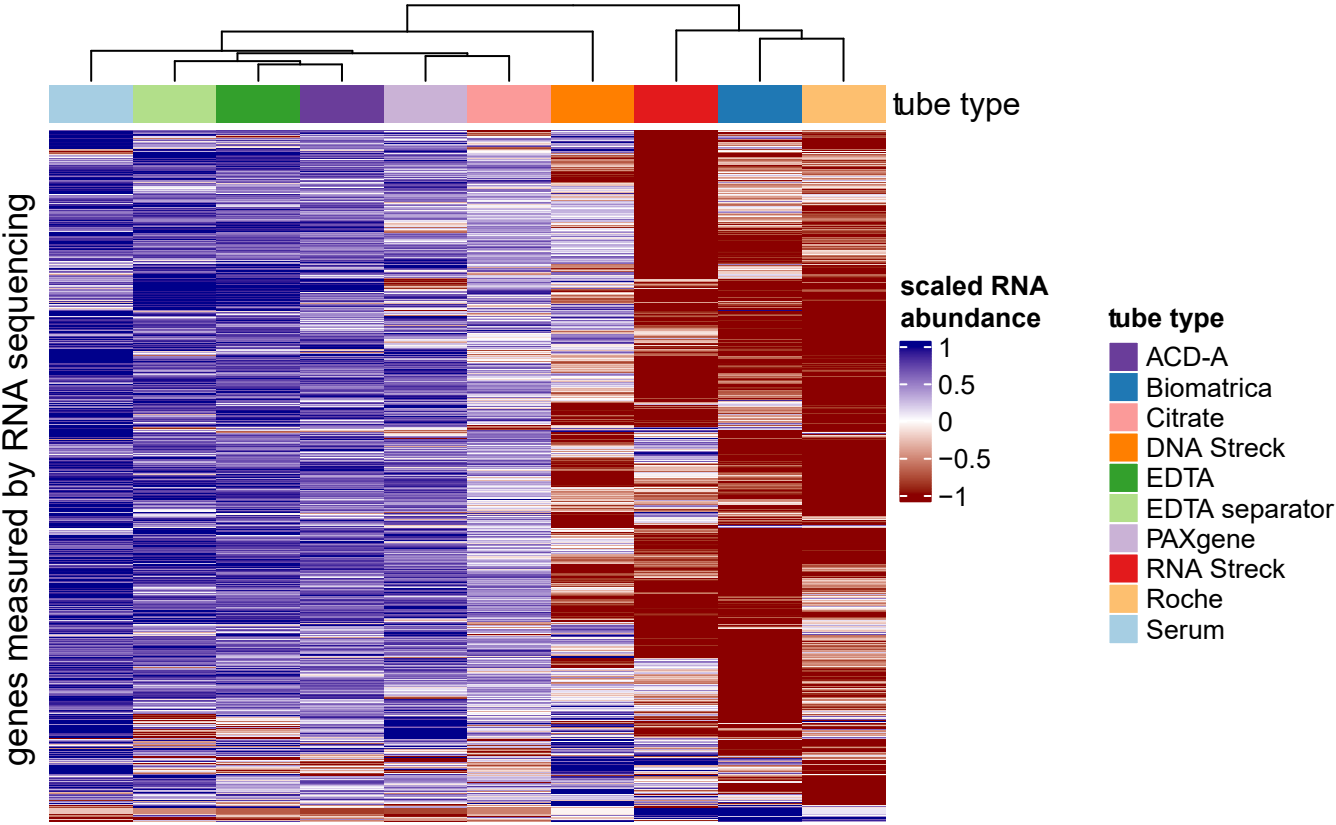

**Supplementary Fig. S12: RNA abundance levels differ across blood collection tubes.** Using normalized and scaled count data, gene abundance levels (i.e., mean abundance of the tube replicates) are shown for each tube type at time interval T0. The normalised counts are scaled between -1 (low abundance) and 1 (high abundance) per gene to make abundance differences across genes comparable. Only genes with  $\geq 10$  counts in all three replicates of one tube type were included. T0=plasma prepared immediately after blood draw. Note that different donors were sampled for *preservation* and classic tubes.
