# Supplementary material for: Blood collection tube and RNA purification method recommendations for extracellular RNA transcriptome profiling: A large-scale pre-analytical variable performance evaluation
Source: Research Square preprint supplement (doi:10.21203/rs.3.rs-2409038/v2), 2024-07-22
Supplement: Supplementary file 4 [file f043665ffdbad9f79be52600.xlsx]

## Sheet: data
publication	number of blood collection tubes	number of RNA purification methods	number of mRNAs	number of miRNAs	number of time intervals	interactions	reference
exRNAQC	10	8	21000	2000	3	yes	NA
Srinivasan et al.	2	10	NA	2000	1	yes	Srinivasan et al. Small RNA sequencing across diverse biofluids identifies optimal methods for exRNA isolation. Cell, 177(2):446-462.e16, 2019.
Murray et al.	6	3	NA	8	6	yes	Murray et al. "Future-proofing" blood processing for measurement of circulating miRNAs in samples from biobanks and prospective clinical trials. Cancer Epidemiol Biomarkers Prev, 27(2):208-218, 2018.
Gahlawat et al.	5	1	NA	6	4	yes	Gahlawat et al. Evaluation of storage tubes for combined analysis of circulating nucleic acids in liquid biopsies. Int J Mol Sci, 20(3):704, 2019.
Moret et al.	1	3	NA	2000	1	no	Moret et al. Assessing an improved protocol for plasma microRNA extraction. PLoS One, 8(12):e82753, 2013.
Wong et al.	1	2	NA	2000	1	no	Wong et al. A comparison of RNA extraction and sequencing protocols for detection of small RNAs in plasma. BMC Genomics, 20(1):446, 2019.
Glinge et al.	4	1	NA	3	3	yes	Glinge et al. Stability of circulating blood-based microRNAs - pre-analytic methodological considerations. PLoS One, 12(2):e0167969, 2017.
El-Khoury et al.	1	4	NA	760	1	no	El-Khoury et al. Assessing cellular and circulating miRNA recovery: the impact of the RNA isolation method and the quantity of input material. Sci Rep, 6:19529, 2016.
Page et al.	1	3	NA	377	2	no	Page et al. Influence of plasma processing on recovery and analysis of circulating nucleic acids. PLoS One, 8(10):e77963, 2013.
Tan et al.	2	5	NA	8	1	no	Tan et al. Evaluation of extraction kits and RT-qPCR systems adapted to high-throughput platform for circulating miRNAs. Sci Rep, 5:9430, 2015.
Meerson et al.	1	6	NA	4	1	no	Meerson et al. Assessment of six commercial plasma small RNA isolation kits using qRT-PCR and electrophoretic separation: higher recovery of microRNA following ultracentrifugation. Biol Methods Protoc, 1(1):bpw003, 2016.
Cheng et al.	2	1	NA	365	2	no	Cheng et al. Plasma processing conditions substantially influence circulating microRNA biomarker levels. PLoS One, 8(6):e64795, 2013.
Kloten et al.	1	5	NA	5	1	no	Kloten et al. Multicenter evaluation of circulating plasma microRNA extraction technologies for the development of clinically feasible reverse transcription quantitative PCR and next-generation sequencing analytical work flows. Clin Chem, 65(9):1132-1140, 2019.
McDonald et al.	2	4	NA	4	1	no	McDonald et al. Analysis of circulating microRNA: preanalytical and analytical challenges. Clin Chem, 57(6):833-40, 2011.
Mitchell et al.	2	1	NA	4	1	no	Mitchell et al. Circulating microRNAs as stable blood-based markers for cancer detection. Proc Natl Acad Sci U S A, 105(30):10513-8, 2008.
Androvic et al.	2	1	NA	3	1	no	Androvic et al. Two-tailed RT-qPCR panel for quality control of circulating microRNA studies. Sci Rep, 9(1):4255, 2019.
Fernando et al.	2	1	4	NA	4	yes	Fernando et al. Stabilization of cell-free RNA in blood samples using a new collection device. Clin Biochem, 45(16-17):1497-502, 2012.
Deleu et al.	2	5	4	NA	1	no	Deleu et al. Digital PCR-based evaluation of nucleic acid extraction kit performance for the co-purification of cell-free DNA and RNA. Hum Genomics, 16(1):73, 2022.
Tsui et al.	2	1	1	NA	1	no	Tsui et al. Stability of endogenous and added RNA in blood specimens, serum, and plasma. Clin Chem, 48(10):1647-53, 2002.
Feng et al.	1	2	NA	2	1	no	Feng et al. Plasma microRNA detection standardization test. J Clin Lab Anal, 34(2):e23058, 2020.
Kim et al.	5	1	NA	2	1	no	Kim et al. Plasma components affect accuracy of circulating cancer-related microRNA quantitation. J Mol Diagn, 14(1):71-80, 2012.
Sourvinou et al.	1	4	NA	2	1	no	Sourvinou et al. Quantification of circulating miRNAs in plasma: effect of preanalytical and analytical parameters on their isolation and stability. J Mol Diagn, 15(6):827-34, 2013.
