# Supplementary material for: Blood collection tube and RNA purification method recommendations for extracellular RNA transcriptome profiling: A large-scale pre-analytical variable performance evaluation
Source: Research Square preprint supplement (doi:10.21203/rs.3.rs-2409038/v2), 2024-07-22
Supplement: Supplementary file 5 [file 2b93728d7519c7667636d674.pdf]

# Supplementary Fig. S5.

**a** evolution over time plot

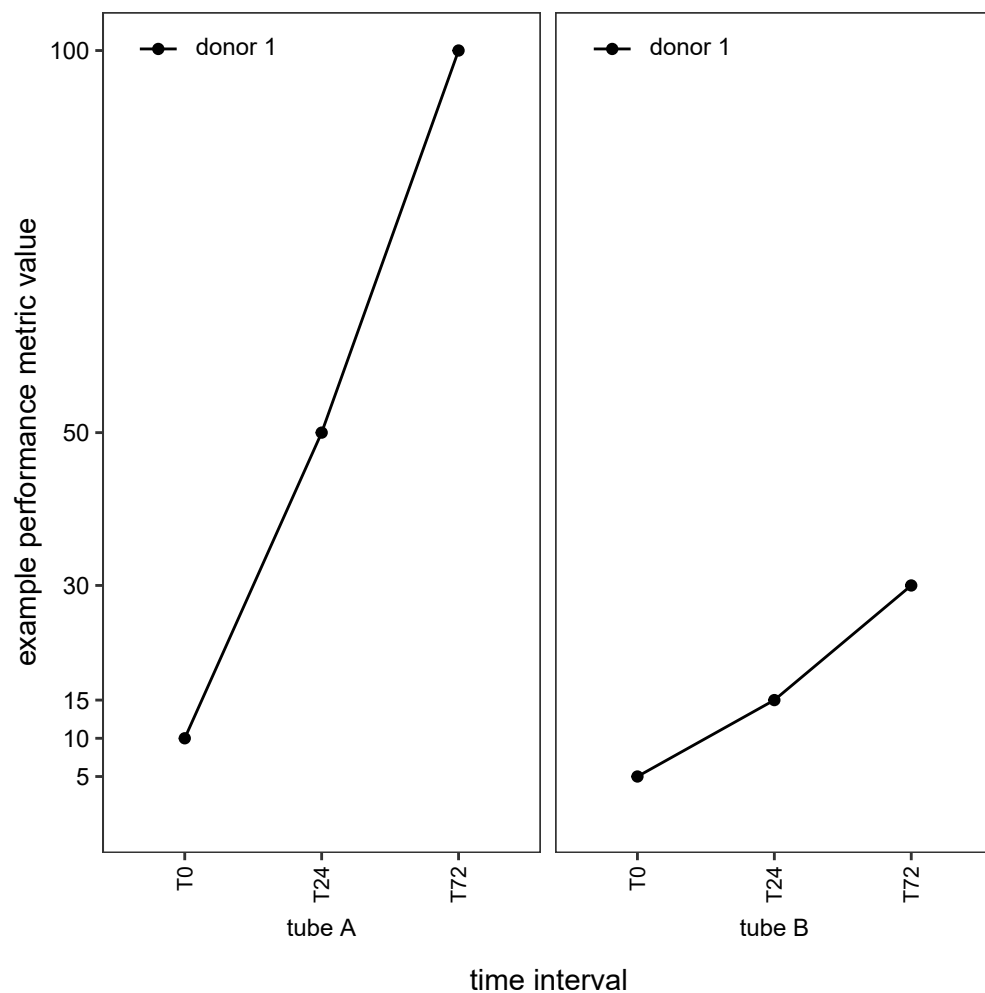

**b** change over time plot

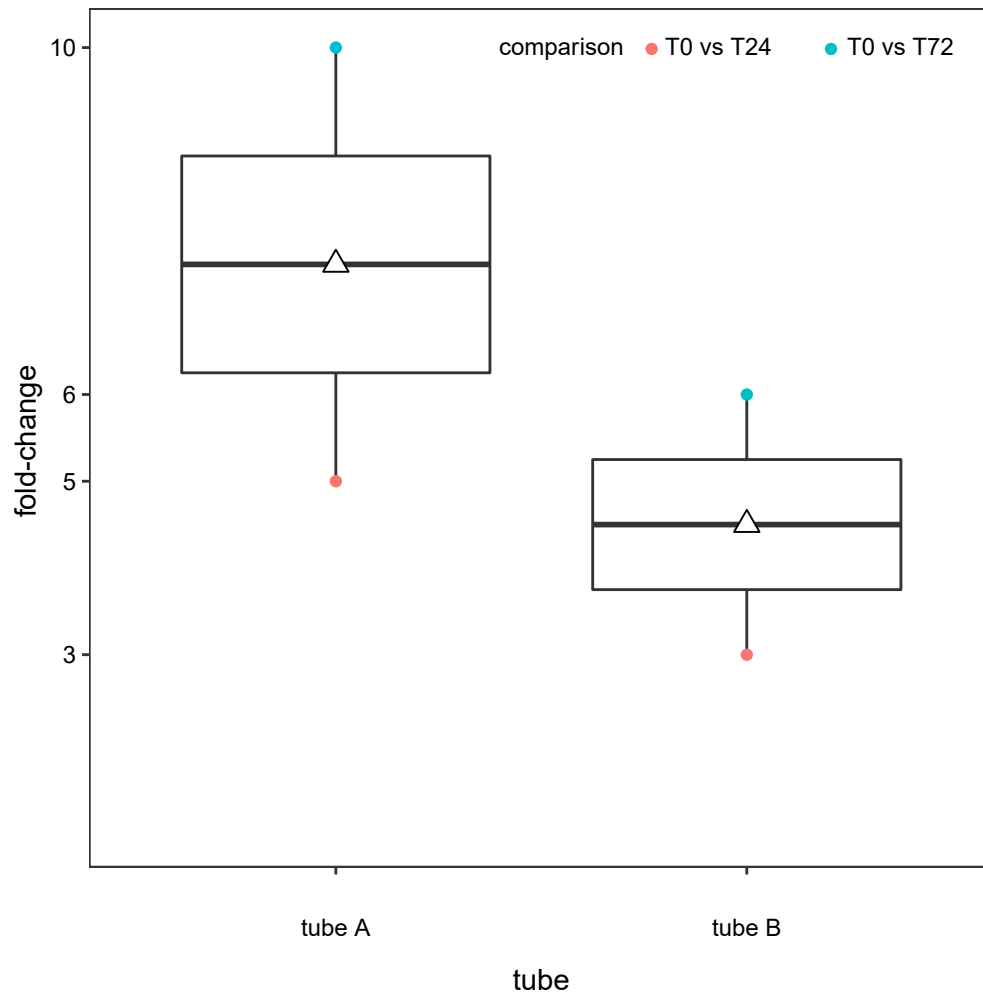

**Supplementary Fig. S5: Development of a novel method to assess performance metric stability over time.** Illustrative example of performance metric evolution over time (raw data) for one donor, two blood collection tubes and three time intervals (a). Per blood collection tube, fold-changes between immediate processing (T0) and the 2 selected processing time intervals (T24 and T72) were calculated and represented as a boxplot with mean values (triangle), representing the change over time (b). Small changes indicate performance metric stability over time. T0=plasma prepared immediately after blood draw, T24, T72=plasma prepared 24 hours and 72 hours after blood draw, respectively. Reproduced from Van Paemel et al.<sup>80</sup>
