# Supplementary material for: Blood collection tube and RNA purification method recommendations for extracellular RNA transcriptome profiling: A large-scale pre-analytical variable performance evaluation
Source: Research Square preprint supplement (doi:10.21203/rs.3.rs-2409038/v2), 2024-07-22
Supplement: Supplementary file 6 [file 4dc9f0b75f7d14ca36ab053e.pdf]

|    |                                                                                               |          |
|----|-----------------------------------------------------------------------------------------------|----------|
| 1  | <b>1. Supplementary Materials and Methods</b>                                                 | <b>3</b> |
| 2  | 1.1. <i>Donor material and biofluid preparation procedure</i>                                 | 3        |
| 3  | 1.1.1. Blood draws and biofluid preparations for exRNAQC study phase 1                        | 3        |
| 4  | Blood draws and plasma preparations for evaluation of the different exRNA purification        |          |
| 5  | methods                                                                                       | 3        |
| 6  | Blood draws and biofluid preparations for evaluation of the different blood collection tubes  | 4        |
| 7  | 1.1.2. Blood draws and biofluid preparations for exRNAQC study phase 2                        | 7        |
| 8  | 1.2. <i>Spike-in controls</i>                                                                 | 11       |
| 9  | 1.2.1. Sequin and External RNA Control Consortium (ERCC) spike-in controls for mRNA           |          |
| 10 | capture sequencing                                                                            | 11       |
| 11 | 1.2.2. Capture probes for Sequin and ERCC spike-in controls                                   | 12       |
| 12 | 1.2.3. RNA purification Control (RC) and Library Preparation Control (LP) spike-ins for miRNA |          |
| 13 | sequencing                                                                                    | 12       |
| 14 | 1.3. <i>RNA purification methods</i>                                                          | 14       |
| 15 | 1.3.1. The miRNeasy Serum/Plasma Kit (abbreviated to miRNeasy method (or MIR in figures       |          |
| 16 | and tables); Qiagen, 217184)                                                                  | 14       |
| 17 | 1.3.2. The miRNeasy Serum/Plasma Advanced Kit (abbreviated to miRNeasy Advanced               |          |
| 18 | method (or MIRA in figures and tables); Qiagen, 217204)                                       | 15       |
| 19 | 1.3.3. The mirVana PARIS Kit (abbreviated to mirVana method (or MIRV and MIRVE in             |          |
| 20 | figures and tables); Life Technologies, AM1556)                                               | 16       |
| 21 | 1.3.4. The NucleoSpin miRNA Plasma Kit (abbreviated to NucleoSpin method (or NUC in           |          |
| 22 | figures and tables); Macherey-Nagel, 740981.50)                                               | 17       |
| 23 | 1.3.5. The QIAamp ccfDNA/RNA Kit (abbreviated to QIAamp method (or QIA in figures and         |          |
| 24 | tables); Qiagen, 55184)                                                                       | 18       |
| 25 | 1.3.6. The Plasma/Serum Circulating and Exosomal RNA Purification Kit/Slurry Format           |          |
| 26 | (abbreviated to Norgen method (or NOR in figures and tables); Norgen Biotek Corp., 42800)     | 19       |
| 27 | 1.3.7. The Maxwell RSC miRNA Plasma and Serum Kit (Promega, custom catalog AX5740,            |          |
| 28 | AS1680) in combination with the Maxwell RSC Instrument (abbreviated to Maxwell method (or     |          |
| 29 | MAX in figures and tables); Promega, AS4500)                                                  | 20       |

|    |                                                                                                      |           |
|----|------------------------------------------------------------------------------------------------------|-----------|
| 30 | Protocol AX5740                                                                                      | 21        |
| 31 | Protocol AS1680                                                                                      | 21        |
| 32 | 1.3.8. The MagNA Pure 24 Total NA Isolation Kit (Roche, 07658036001) in combination with             |           |
| 33 | the MagNA Pure 24 instrument (abbreviated to MagNA Pure method (or MAP in figures and                |           |
| 34 | tables); Roche, 07290519001)                                                                         | 21        |
| 35 | 1.4. <i>RNA concentration measurements</i>                                                           | 22        |
| 36 | <b>2. Supplementary Results</b>                                                                      | <b>22</b> |
| 37 | 2.1. <i>MagNa Pure purification co-purifies DNA and is incompatible with the applied genomic DNA</i> |           |
| 38 | <i>removal strategy</i>                                                                              | 22        |
| 39 | <b>3. References</b>                                                                                 | <b>23</b> |
| 40 |                                                                                                      |           |
| 41 |                                                                                                      |           |

## 42 1. Supplementary Materials and Methods

### 43 1.1. Donor material and biofluid preparation procedure

#### 44 1.1.1. Blood draws and biofluid preparations for exRNAQC study phase 1

##### 45 Blood draws and plasma preparations for evaluation of the different exRNA purification 46 methods

47 To evaluate eight different exRNA purification methods, separate blood draws were performed  
48 for each RNA sequencing workflow (mRNA or miRNA). The blood was drawn at once from  
49 each healthy donor and immediately processed to plasma. More specifically, 25 and 26 BD  
50 Vacutainer Plastic K2EDTA tubes (Becton Dickinson and Company, 367525) were collected  
51 in a single elbow venipuncture using a BD Vacutainer Push Button Blood Collection Set  
52 (Becton Dickinson and Company, 367326) for mRNA capture sequencing (experiment  
53 exRNAQC004) and miRNA sequencing (experiment exRNAQC011), respectively. All tubes  
54 were inverted 5 times to mix the anti-coagulant with the blood, immediately transported to the  
55 lab for further processing, and inverted 5 times before taking an aliquot to measure the number  
56 of platelets present in whole blood (using an XN-1000 Hematology Analyzer (Sysmex)). Next,  
57 centrifugation was performed in a Centrifuge 5804 (Eppendorf, 5804000013) with Rotor A-4-  
58 44 (Eppendorf, 5804709004) and appropriate adapters (Eppendorf, 5804753003) at  
59 acceleration and braking ramp 0. In a first centrifugation step, blood collection tubes were spun  
60 for 20 min at 400 g at room temperature, and the obtained plasma was carefully pooled, leaving  
61  $\pm 0.5$  cm above the buffy coat. An aliquot of 7.3 ml (for mRNA capture sequencing) or 6.9 ml  
62 (for miRNA sequencing) pooled plasma was set aside and the remaining volume of plasma  
63 equally distributed across 15 ml tubes (Greiner Bio-One International, 188271) to be  
64 centrifuged for 10 min at 800 g at room temperature. After this second spin, all plasma was  
65 pooled, leaving  $\pm 0.5$  cm above the pellets and again equally distributed across 15 ml tubes.  
66 Subsequently, a third spin of 15 min at 2500 g at room temperature was applied. The plasma  
67 was again pooled, leaving  $\pm 0.5$  cm above the pellets. In total, 66 ml (for mRNA capture  
68 sequencing) or 69 ml (for miRNA sequencing) of this plasma was mixed with the corresponding  
69 plasma aliquot previously set aside. This plasma mixture was aliquoted into Safe-Lock cup

70 DNA LoBind 2 ml PCR clean tubes (Eppendorf, 0030108078), snap frozen in liquid nitrogen  
71 and stored at -80 °C. Platelets were counted and the degree of hemolysis was determined by  
72 measuring levels of free haemoglobin by spectral analysis using a NanoDrop 1000  
73 Spectrophotometer (Thermo Fisher Scientific).

74

75 *Blood draws and biofluid preparations for evaluation of the different blood collection tubes*

76 For the evaluation of ten different blood collection tubes (experiments exRNAQC005 and  
77 exRNAQC013), three separate blood draw experiments (one for each class of tubes) were  
78 planned with different donors. In each of these three experiments, three healthy donors were  
79 sampled to collect blood in either classic *serum* tubes, classic plasma tubes or *preservation*  
80 plasma tubes (Table 1). For collection of the *serum* tubes, a single puncture of an antecubital  
81 vein was performed for each of the three donors using the BD Vacutainer Push Button Blood  
82 Collection Set with pre-attached tube holder (Becton Dickinson and Company, 368657). For  
83 collection of the classic plasma tubes, two punctures (one in each antecubital vein) were  
84 performed to collect 6 tubes from each arm using the BD Vacutainer Push Button Blood  
85 Collection Set with pre-attached tube holder (Becton Dickinson and Company, 368657). For  
86 collection of the *preservation* plasma tubes, also two punctures were performed to collect 7  
87 tubes from one antecubital vein and 8 tubes from the contralateral antecubital vein, using a BD  
88 Vacutainer Push Button Blood Collection Set with pre-attached tube holder (Becton Dickinson  
89 and Company, 367355). Note that for donor PNL-6AJP, three *DNA Streck* tubes needed to be  
90 redrawn at the end of the second vein puncture, due to loss of vacuum of the first three *DNA*  
91 *Streck* tubes that were used (Table 1). Each blood draw from each puncture started with  
92 collecting 2-3 ml blood in a waste tube, followed by collection of the different tube types. The  
93 collection order of these tubes was randomized per donor. Blood tubes were filled to the  
94 volume recommended by the manufacturer and plasma tubes were inverted 5 times to mix the  
95 anti-coagulant with the blood (Table 1). Subsequently, blood collection tubes were processed  
96 immediately (T0), or 4 h (T04), 16 h (T16), 24 h (T24) or 72 h (T72) at room temperature after  
97 blood collection in order to prepare plasma or Table 1).

99 **Table 1. Overview of the blood draws for evaluation of the 10 different blood collection tubes.** For each of  
 100 the three blood draw experiments, the draw order of the tubes per donor is given. *serum*: BD Vacutainer SST II  
 101 Advance Tube (Becton Dickinson and Company, 366444); *EDTA*: BD Vacutainer Plastic K2EDTA tube (Becton  
 102 Dickinson and Company, 367525); *EDTA separator*: Vacuette Tube 8 ml K2E K2EDTA Separator (Greiner Bio-  
 103 One, 455040); *ACD-A*: BD Vacutainer Glass ACD Solution A tube (Becton Dickinson and Company, 366645);  
 104 *citrate*: Vacuette Tube 9 ml 9NC Coagulation sodium citrate 3.2% (Greiner Bio-One, 455322); *Roche*: Cell-Free  
 105 DNA Collection Tube (Roche, 07785666001); *Qiagen*: PAXgene Blood ccfDNA Tube (Qiagen, 768115); *Biomatrix*:  
 106 LBgard Blood Tube (Biomatrix, M68021-001); *DNA Streck*: Cell-Free DNA BCT (Streck, 218996); *RNA Streck*:  
 107 Cell-Free RNA BCT (Streck, 230248).

| blood draw experiment | donor    | puncture           | tube order         | time to process |
|-----------------------|----------|--------------------|--------------------|-----------------|
| classic serum         | PNL-41H8 | 1                  | (1) serum          | T0              |
|                       |          |                    | (2) serum          | T16             |
|                       |          |                    | (3) serum          | T04             |
|                       | PNL-5TTC | 1                  | (1) serum          | T16             |
|                       |          |                    | (2) serum          | T04             |
|                       |          |                    | (3) serum          | T0              |
|                       | PNL-WUVM | 1                  | (1) serum          | T04             |
|                       |          |                    | (2) serum          | T16             |
|                       |          |                    | (3) serum          | T0              |
| classic plasma        | PNL-5AP8 | 1                  | (1) EDTA           | T0              |
|                       |          |                    | (2) EDTA separator | T16             |
|                       |          |                    | (3) EDTA separator | T0              |
|                       |          |                    | (4) EDTA           | T16             |
|                       |          |                    | (5) ACD-A          | T16             |
|                       |          |                    | (6) ACD-A          | T0              |
|                       |          | 2                  | (1) EDTA           | T04             |
|                       |          |                    | (2) ACD-A          | T04             |
|                       |          |                    | (3) citrate        | T16             |
|                       |          |                    | (4) citrate        | T04             |
|                       |          |                    | (5) citrate        | T0              |
|                       |          |                    | (6) EDTA separator | T04             |
|                       | PNL-BRCV | 1                  | (1) ACD-A          | T0              |
|                       |          |                    | (2) EDTA           | T04             |
|                       |          |                    | (3) EDTA separator | T04             |
|                       |          |                    | (4) EDTA           | T16             |
|                       |          |                    | (5) EDTA separator | T0              |
|                       |          |                    | (6) citrate        | T16             |
|                       |          | 2                  | (1) citrate        | T0              |
|                       |          |                    | (2) citrate        | T04             |
|                       |          |                    | (3) EDTA           | T0              |
|                       |          |                    | (4) ACD-A          | T16             |
|                       |          |                    | (5) EDTA separator | T16             |
|                       |          |                    | (6) ACD-A          | T04             |
| PNL-E6AU              | 1        | (1) citrate        | T04                |                 |
|                       |          | (2) EDTA           | T04                |                 |
|                       |          | (3) EDTA           | T0                 |                 |
|                       |          | (4) EDTA separator | T0                 |                 |
|                       | 2        | (5) ACD-A          | T0                 |                 |
|                       |          | (6) citrate        | T16                |                 |
|                       |          | (1) citrate        | T0                 |                 |
|                       |          | (2) ACD-A          | T16                |                 |
|                       |          |                    | (3) EDTA separator | T04             |
|                       |          |                    | (4) ACD-A          | T04             |

| blood draw experiment | donor      | puncture       | tube order         | time to process |
|-----------------------|------------|----------------|--------------------|-----------------|
| preservation plasma   | PNL-KJ6S   | 1              | (5) EDTA           | T16             |
|                       |            |                | (6) EDTA separator | T16             |
|                       |            |                | (1) Roche          | T72             |
|                       |            |                | (2) Qiagen         | T24             |
|                       |            |                | (3) Biomatrix      | T0              |
|                       |            |                | (4) Roche          | T0              |
|                       |            |                | (5) DNA Streck     | T24             |
|                       |            | (6) RNA Streck | T24                |                 |
|                       |            | (7) DNA Streck | T0                 |                 |
|                       |            | 2              | (1) Qiagen         | T72             |
|                       |            |                | (2) Biomatrix      | T72             |
|                       |            |                | (3) Biomatrix      | T24             |
|                       |            |                | (4) RNA Streck     | T72             |
|                       |            |                | (5) RNA Streck     | T0              |
|                       | (6) Roche  |                | T24                |                 |
|                       | (7) Qiagen |                | T0                 |                 |
|                       | PNL-6AJP   | 1              | (8) DNA Streck     | T72             |
|                       |            |                | (1) RNA Streck     | T0              |
|                       |            |                | (2) Qiagen         | T0              |
|                       |            |                | (3) DNA Streck     | not processed   |
|                       |            |                | (4) Biomatrix      | T0              |
|                       |            |                | (5) Roche          | T24             |
|                       |            |                | (6) Biomatrix      | T24             |
|                       |            | 2              | (7) DNA Streck     | not processed   |
|                       |            |                | (1) Roche          | T0              |
|                       |            |                | (2) Biomatrix      | T72             |
|                       |            |                | (3) RNA Streck     | T24             |
|                       |            |                | (4) Roche          | T72             |
|                       |            |                | (5) Qiagen         | T72             |
|                       |            |                | (6) Qiagen         | T24             |
|                       |            |                | (7) RNA Streck     | T72             |
|                       |            |                | (8) DNA Streck     | not processed   |
|                       |            |                | (9) DNA Streck     | T0              |
| (10) DNA Streck       |            |                | T24                |                 |
| (11) DNA Streck       |            |                | T72                |                 |
| PNL-IBXE              | 1          | (1) Qiagen     | T0                 |                 |
|                       |            | (2) RNA Streck | T0                 |                 |
|                       |            | (3) DNA Streck | T0                 |                 |
|                       |            | (4) RNA Streck | T72                |                 |
|                       |            | (5) Roche      | T24                |                 |
|                       |            | (6) Roche      | T0                 |                 |
|                       |            | (7) RNA Streck | T24                |                 |
|                       | 2          | (1) Qiagen     | T72                |                 |
|                       |            | (2) Qiagen     | T24                |                 |
|                       |            | (3) DNA Streck | T72                |                 |
|                       |            | (4) Biomatrix  | T0                 |                 |
|                       |            | (5) DNA Streck | T24                |                 |
|                       |            | (6) Roche      | T72                |                 |
|                       |            | (7) Biomatrix  | T24                |                 |
| (8) Biomatrix         | T72        |                |                    |                 |

108

109 **Classic serum tubes** were processed at T0 (i.e. 30 min upon blood collection to enable full  
110 blood coagulation), T04 or T16 according to the following protocol. Until processing, the tubes  
111 were stored upright at room temperature. Tubes were spun for 10 min at 1300 g at room  
112 temperature using a Centrifuge 5804 (Eppendorf, 5804000013) with Rotor A-4-44 (Eppendorf,  
113 5804709004) and appropriate adapters (Eppendorf, 5804753003) at acceleration and braking

114 ramp 0. For each tube, the obtained serum was carefully pipetted into a 15 ml tube (Greiner  
115 Bio-One International, 188271), leaving  $\pm 0.5$  cm above the separator. Serum was then  
116 aliquoted into Safe-Lock cup DNA LoBind 2 ml PCR clean tubes (Eppendorf, 0030108078),  
117 snap frozen in liquid nitrogen and stored at  $-80$  °C. Platelets were counted (only for T0) and  
118 the degree of hemolysis was determined by measuring levels of free haemoglobin by spectral  
119 analysis using a NanoDrop 1000 Spectrophotometer (Thermo Fisher Scientific).

120

121 **Classic plasma tubes** were processed at T0 (i.e. immediately), T04 or T16, and **preservation**  
122 **plasma tubes** at T0, T24 or T72, according to the following protocol. Until processing, the  
123 tubes were stored upright at room temperature. Right before centrifugation, tubes were  
124 inverted 5 times and an aliquot to measure the number of platelets present in full blood (using  
125 an XN-1000 Hematology Analyzer (Sysmex)) was taken. Tubes were spun on a Centrifuge  
126 5804 (Eppendorf, 5804000013) with Rotor A-4-44 (Eppendorf, 5804709004) and appropriate  
127 adapters (Eppendorf, 5804753003) at acceleration and braking ramp 0. In a first centrifugation  
128 step, blood collection tubes were spun for 20 min at 400 g at room temperature, and for each  
129 tube, the obtained plasma was carefully pipetted into a 15 ml tube (Greiner Bio-One  
130 International, 188271), leaving  $\pm 0.5$  cm above the buffy coat. Subsequently, these tubes were  
131 centrifuged for 10 min at 800 g at room temperature. After this second spin, the plasma was  
132 pipetted into new 15 ml tubes, leaving  $\pm 0.5$  cm above the pellets. Finally, a third spin of 15  
133 min at 2500 g at room temperature was applied. The plasma was again pipetted into new 15  
134 ml tubes, leaving  $\pm 0.5$  cm above the pellets, and aliquoted into Safe-Lock cup DNA LoBind 2  
135 ml PCR clean tubes (Eppendorf, 0030108078), snap frozen in liquid nitrogen and stored at -  
136  $80$  °C. Platelets were counted and the degree of hemolysis was determined by measuring  
137 levels of free haemoglobin by spectral analysis using a NanoDrop 1000 Spectrophotometer  
138 (Thermo Fisher Scientific).

139

#### 140 1.1.2. *Blood draws and biofluid preparations for exRNAQC study phase 2*

141 For each sequencing workflow, a separate blood draw experiment with five donors was

142 performed (Table 2). Blood was collected in either *serum* (BD Vacutainer SST II Advance  
 143 Tube; Becton Dickinson and Company, 367953), *EDTA* (BD Vacutainer Plastic K2EDTA tube;  
 144 Becton Dickinson and Company, 367525) or *citrate* (Vacuette Tube 9 ml 9NC Coagulation  
 145 sodium citrate 3.2%; Greiner Bio-One, 455322) tubes. For collection, a single puncture of an  
 146 antecubital vein was performed for each donor using the BD Vacutainer Push Button Blood  
 147 Collection Set with pre-attached tube holder (Becton Dickinson and Company, 368657), except  
 148 for donor PNL-QJMM. For this donor, blood collection was briefly paused after filling six tubes  
 149 and continued using a second puncture in the contralateral antecubital vein (Table 2). Each  
 150 blood draw from each puncture, except the second puncture of donor PNL-QJMM, started with  
 151 collecting 2-3 ml blood in a waste tube, followed by collection of the different tube types. The  
 152 collection order of these tubes was randomized per donor. Blood tubes were filled to the  
 153 volume recommended by the manufacturer and plasma tubes were inverted 5 times to mix the  
 154 anti-coagulant with the blood. Subsequently, blood collection tubes were processed  
 155 immediately (T0), or 4 h (T04) or 16 h (T16) at room temperature after blood collection in order  
 156 to prepare plasma or serum (Table 2).

157

158 **Table 2. Overview of the blood draws for exRNAQC study phase 2.** For each sequencing workflow, the blood  
 159 draw order of the tubes per donor is given. *serum*: BD Vacutainer SST II Advance Tube (Becton Dickinson and  
 160 Company, 367953); *EDTA*: BD Vacutainer Plastic K2EDTA tube (Becton Dickinson and Company, 367525); *citrate*:  
 161 Vacuette Tube 9 ml 9NC Coagulation sodium citrate 3.2% (Greiner Bio-One, 455322).

| blood draw experiment   | donor    | puncture           | tube order         | time to process |
|-------------------------|----------|--------------------|--------------------|-----------------|
| mRNA capture sequencing | PNL-RM7B | 1                  | (1) <i>citrate</i> | T16             |
|                         |          |                    | (2) <i>EDTA</i>    | T0              |
|                         |          |                    | (3) <i>citrate</i> | T04             |
|                         |          |                    | (4) <i>serum</i>   | T0              |
|                         |          |                    | (5) <i>citrate</i> | T0              |
|                         |          |                    | (6) <i>EDTA</i>    | T16             |
|                         |          |                    | (7) <i>serum</i>   | T04             |
|                         |          |                    | (8) <i>EDTA</i>    | T04             |
|                         |          |                    | (9) <i>serum</i>   | T16             |
|                         | PNL-QJMM | 1                  | (1) <i>citrate</i> | T0              |
|                         |          |                    | (2) <i>EDTA</i>    | T0              |
|                         |          |                    | (3) <i>serum</i>   | T16             |
|                         |          |                    | (4) <i>EDTA</i>    | T16             |
|                         |          |                    | (5) <i>serum</i>   | T0              |
| PNL-QJMM                | 2        | (6) <i>EDTA</i>    | T04                |                 |
|                         |          | (1) <i>citrate</i> | T04                |                 |
|                         |          |                    | (2) <i>citrate</i> | T16             |

| blood draw experiment | donor    | puncture    | tube order  | time to process |
|-----------------------|----------|-------------|-------------|-----------------|
|                       | PNL-2AAR | 1           | (3) serum   | T04             |
|                       |          |             | (1) citrate | T04             |
|                       |          |             | (2) citrate | T16             |
|                       |          |             | (3) EDTA    | T0              |
|                       |          |             | (4) serum   | T0              |
|                       |          |             | (5) EDTA    | T16             |
|                       |          |             | (6) EDTA    | T04             |
|                       |          |             | (7) serum   | T04             |
|                       |          |             | (8) serum   | T16             |
|                       | PNL-XNID | 1           | (9) citrate | T0              |
|                       |          |             | (1) serum   | T0              |
|                       |          |             | (2) EDTA    | T04             |
|                       |          |             | (3) citrate | T04             |
|                       |          |             | (4) EDTA    | T0              |
|                       |          |             | (5) citrate | T0              |
|                       |          |             | (6) citrate | T16             |
|                       |          |             | (7) EDTA    | T16             |
|                       |          |             | (8) serum   | T04             |
|                       | PNL-ZT37 | 1           | (9) serum   | T16             |
|                       |          |             | (1) EDTA    | T0              |
|                       |          |             | (2) citrate | T0              |
|                       |          |             | (3) serum   | T16             |
|                       |          |             | (4) serum   | T04             |
|                       |          |             | (5) serum   | T0              |
|                       |          |             | (6) EDTA    | T16             |
|                       |          |             | (7) EDTA    | T04             |
|                       |          |             | (8) citrate | T16             |
| miRNA sequencing      | PNL-7DEN | 1           | (9) citrate | T04             |
|                       |          |             | (1) citrate | T16             |
|                       |          |             | (2) citrate | T04             |
|                       |          |             | (3) EDTA    | T04             |
|                       |          |             | (4) serum   | T04             |
|                       |          |             | (5) citrate | T0              |
|                       |          |             | (6) EDTA    | T16             |
|                       |          |             | (7) EDTA    | T0              |
|                       |          |             | (8) serum   | T16             |
|                       | PNL-8Z11 | 1           | (9) serum   | T0              |
|                       |          |             | (1) EDTA    | T16             |
|                       |          |             | (2) citrate | T16             |
|                       |          |             | (3) citrate | T0              |
|                       |          |             | (4) serum   | T04             |
|                       |          |             | (5) EDTA    | T0              |
|                       |          |             | (6) serum   | T0              |
|                       |          |             | (7) serum   | T16             |
|                       |          |             | (8) citrate | T04             |
|                       | PNL-NLID | 1           | (9) EDTA    | T04             |
|                       |          |             | (1) citrate | T16             |
|                       |          |             | (2) serum   | T04             |
|                       |          |             | (3) citrate | T04             |
|                       |          |             | (4) EDTA    | T04             |
|                       |          |             | (5) serum   | T0              |
|                       |          |             | (6) citrate | T0              |
|                       |          |             | (7) EDTA    | T16             |
|                       |          |             | (8) serum   | T16             |
| PNL-UCH7              | 1        | (9) EDTA    | T0          |                 |
|                       |          | (1) EDTA    | T0          |                 |
|                       |          | (2) citrate | T0          |                 |
|                       |          | (3) citrate | T16         |                 |
|                       |          | (4) serum   | T04         |                 |
|                       |          | (5) serum   | T16         |                 |
|                       |          | (6) citrate | T04         |                 |
|                       |          | (7) EDTA    | T16         |                 |
| (8) EDTA              | T04      |             |             |                 |

| blood draw experiment | donor | puncture | tube order         | time to process |
|-----------------------|-------|----------|--------------------|-----------------|
|                       |       |          | (9) <i>serum</i>   | T0              |
|                       |       |          | (1) <i>EDTA</i>    | T0              |
|                       |       |          | (2) <i>serum</i>   | T0              |
|                       |       |          | (3) <i>EDTA</i>    | T16             |
|                       |       |          | (4) <i>citrate</i> | T04             |
|                       |       |          | (5) <i>serum</i>   | T04             |
|                       |       |          | (6) <i>EDTA</i>    | T04             |
|                       |       |          | (7) <i>citrate</i> | T16             |
|                       |       |          | (8) <i>citrate</i> | T0              |
|                       |       |          | (9) <i>serum</i>   | T16             |

162

163 *Serum tubes* were processed at T0 (i.e. 30 min upon blood collection to enable full blood  
164 coagulation), T04 or T16 according to the following protocol. Until processing, the tubes were  
165 stored upright at room temperature. Tubes were spun for 10 min at 1300 g at room temperature  
166 using a Centrifuge 5804 (Eppendorf, 5804000013) with Rotor A-4-44 (Eppendorf,  
167 5804709004) and appropriate adapters (Eppendorf, 5804753003) at acceleration and braking  
168 ramp 0. For each tube, the obtained serum was carefully pipetted into a 15 ml tube (Greiner  
169 Bio-One International, 188271), leaving  $\pm$  0.5 cm above the separator. Serum was then  
170 aliquoted into Safe-Lock cup DNA LoBind 2 ml PCR clean tubes (Eppendorf, 0030108078),  
171 snap frozen in liquid nitrogen and stored at -80 °C. Platelets were counted and the degree of  
172 hemolysis was determined by measuring levels of free haemoglobin by spectral analysis using  
173 a NanoDrop 1000 Spectrophotometer (Thermo Fisher Scientific).

174

175 *Plasma tubes* were processed at T0 (i.e. immediately), T04 or T16 according to the following  
176 protocol. Until processing, the tubes were stored upright at room temperature. Right before  
177 centrifugation, tubes were inverted 5 times and an aliquot to measure the number of platelets  
178 present in whole blood (using an XN-1000 Hematology Analyzer (Sysmex)) was taken. Tubes  
179 were spun on a Centrifuge 5804 (Eppendorf, 5804000013) with Rotor A-4-44 (Eppendorf,  
180 5804709004) and appropriate adapters (Eppendorf, 5804753003) at acceleration and braking  
181 ramp 0. In a first centrifugation step, blood collection tubes were spun for 20 min at 400 g at  
182 room temperature, and for each tube, the obtained plasma was carefully pipetted into a 15 ml  
183 tube (Greiner Bio-One International, 188271), leaving  $\pm$  0.5 cm above the buffy coat.  
184 Subsequently, these tubes were centrifuged for 10 min at 800 g at room temperature. After

185 this second spin, the plasma was pipetted into new 15 ml tubes, leaving  $\pm 0.5$  cm above the  
186 pellets. Finally, a third spin of 15 min at 2500 g at room temperature was applied. The plasma  
187 was again pipetted into new 15 ml tubes, leaving  $\pm 0.5$  cm above the pellets, and aliquoted  
188 into Safe-Lock cup DNA LoBind 2 ml PCR clean tubes (Eppendorf, 0030108078), snap frozen  
189 in liquid nitrogen and stored at  $-80$  °C. Platelets were counted and the degree of hemolysis  
190 was determined by measuring levels of free haemoglobin by spectral analysis using a  
191 NanoDrop 1000 Spectrophotometer (Thermo Fisher Scientific).

192

## 193 **1.2. Spike-in controls**

194 Adding spike-in controls is key for exRNA profiling as the RNA sequencing input is volume-  
195 based. To correct for both RNA input (either induced by the original sample or RNA isolation  
196 efficiency) and library preparation variation, two sets of spike-ins are used. RC and/or Sequin  
197 spike-ins are added during RNA isolation (upon sample lysis), and LP and/or ERCC spike-ins  
198 are added to the RNA eluate (before gDNA removal and library preparation). Depending on  
199 the amount of platelet RNA present in plasma, different spike-in concentrations are used,  
200 aiming for  $\pm 5\%$  reads going to the total amount of spike-ins.

201

### 202 *1.2.1. Sequin and External RNA Control Consortium (ERCC) spike-in controls for mRNA* 203 *capture sequencing*

204 For profiling using the TruSeq RNA Exome Library Prep kit, Sequin spike-in controls (Garvan  
205 Institute of Medical Research, <https://www.sequinstandards.com>) are added to the lysate  
206 during RNA isolation. Aiming to obtain 2.5% sequencing reads aligning to the spike-in controls,  
207 a 1/1,000,000 Sequin spike-in dilution in RNase-free water was used. Per 100  $\mu$ l liquid biopsy  
208 input volume, 1  $\mu$ l Sequin spike-in controls (Garvan Institute of Medical Research<sup>27</sup>) was  
209 added to the lysate (see main manuscript).

210

211 The second spike-in set for profiling using the TruSeq RNA Exome Library Prep kit that we  
212 add after RNA isolation are ERCC spikes (ThermoFisher Scientific, 4456740). As for the

213 Sequin spike-ins, we aimed to have 2.5% of the reads going to these RNA molecules. Here, a  
214 1/500,000 dilution in RNase-free water was used. ERCC spikes were added before gDNA  
215 removal (see main manuscript for volumes).

216

### 217 *1.2.2. Capture probes for Sequin and ERCC spike-in controls*

218 To detect the spike-in controls, the capture probes of the TruSeq RNA Exome kit are  
219 complemented with capture probes for both the Sequin and ERCC spike-in sets in the first and  
220 second hybridization step of the library preparation protocol. These probes are 80-mers  
221 designed by tiling the spike-in sequences and do not map to the human genome. To this  
222 purpose, only 80-mers with a GC content between 25-70%, a GC-based  $T_m$  between 60-80  
223 °C and a  $\Delta G$  larger than -7 (calculated by UNAFold (version 3.8) settings: hybrid-ss-min -E -n  
224 DNA -t 54 -T 54) were retained, and further filtered to end up with 3560 probes, i.e. the minimal  
225 number of probes needed to obtain optimal spike-in coverage. The sequences of these oligos  
226 are provided in Supplemental table 11. Here, a 70.4 ng/ $\mu$ l stock concentration of biotinylated  
227 80-mer capture probes (Twist Biosciences) was used, resulting in a concentration of 4 nM per  
228 probe.

229

### 230 *1.2.3. RNA purification Control (RC) and Library Preparation Control (LP) spike-ins for miRNA* 231 *sequencing*

232 For profiling using the TruSeq Small RNA Library Prep Kit, RNA purification Control (RC) spike-  
233 ins (custom order at IDT) are added to the lysate during RNA isolation, and Library Preparation  
234 Control (LP) spike-ins to the RNA eluate.

235 RC spike-ins are a pool of RNA purification dynamic range controls (25-mer  
236 oligoribonucleotides; RC1-01 - RC1-12) and RNA purification size controls (25-, 28- or 34-mer  
237 oligoribonucleotide; RC2-25 - RC2-34) selected from literature (Locati et al., Nucleic Acids  
238 Res., 2015). RC spike-in IDs and sequences are listed in Table 3.

239

240 **Table 3. Different RNA purification Control (RC) spike-ins are used.** For each RC spike-in, the ID, sequence

241 and relative concentration in the 10 pM RC spike-in pool are shown.

| RC spike-in IDs | sequence                           | relative concentration |
|-----------------|------------------------------------|------------------------|
| RC1-01          | ACUCAUCUACGUACGCAUCUAGUCU          | 0.01 x                 |
| RC1-03          | UGCUAUCAUAUCACAGUACGCGAGC          | 0.01 x                 |
| RC1-04          | UAGAUGAGAUACUGAUAGCGACGUA          | 0.01 x                 |
| RC1-06          | AUCGUCUCGUCUACUCAUAUCUACA          | 0.1 x                  |
| RC1-07          | UAUGCAUAUGAUCACGAGACUCAGU          | 1 x                    |
| RC1-09          | GCUCUACACUCUACUCGUCAGCUGU          | 1 x                    |
| RC1-10          | CGAUGCUAUAGACUCUCACGUGAUG          | 1 x                    |
| RC1-11          | CGAUCAGUCGUCUACUAGAUACAG           | 0.1 x                  |
| RC1-12          | CUGAUGAUAGAUACGCGCACACAGU          | 0.1 x                  |
| RC2-25          | AUGCUGAUGAUAGACGCUACUGACU          | 0.1 x                  |
| RC2-28          | CGUAUCGUCGUCUCUGAGUCACUAUCUAC      | 0.1 x                  |
| RC2-34          | AGAUAGUACUGAUCUGCUGCGACGAGUGACUGUC | 0.1 x                  |

242

243 LP spike-ins are a pool of small RNA sequencing library preparation controls (22-mer  
 244 oligoribonucleotides; LP1-01 - LP1-12) selected from literature (Hafner et al., RNA, 2011). LP  
 245 spike-in IDs and sequences are listed in Table 4.

246

247 **Table 4. Different Library Preparation Control (LP) spike-ins are used.** For each LP spike in, the ID, sequence  
 248 and relative concentration in the 10 pM LP spike-in pool are shown.

| LP spike-in IDs | sequence               | relative concentration |
|-----------------|------------------------|------------------------|
| LP1-01          | GUCCCACUCCGUAGAUCUGUUC | 1 x                    |
| LP1-02          | GAUGUAACGAGUUGGAAUGCAA | 0.01 x                 |
| LP1-03          | UAGCAUAUCGAGCCUGAGAACA | 0.1 x                  |
| LP1-04          | CAUCGGUCGAACUUAUGUGAAA | 0.01 x                 |
| LP1-06          | UCUUAACCCGGACCAGAAACUA | 1 x                    |
| LP1-07          | AGGUUCCGGAUAAGUAAGAGCC | 1 x                    |
| LP1-10          | UGAUACGGAUGUUAUACGCAGC | 0.1 x                  |
| LP1-11          | CCUGGAACUUAGGACGUGAAUC | 0.1 x                  |
| LP1-12          | UCAUGAGUCCGUACCUUGAUUG | 0.01 x                 |

249

250 RC and LP spike-ins concentrations were optimized, aiming to obtain 2.5% sequencing reads  
 251 aligning to the spike-in controls. To this purpose, RC and LP spike-ins were dissolved to 200  
 252  $\mu$ M stock solutions using nuclease-free water (Sigma-Aldrich, W4502), and equimolarly pooled  
 253 to 333 nM. Subsequently, 6.25 pM, 625 fM and 62.5 fM pools were created using a 500 nM  
 254 carrier oligo (TCGAAGTATTC; diluted in nuclease-free water) to dilute the initial 333 nM pool.  
 255 These three pools were spiked into plasma during RNA isolation, by adding 2  $\mu$ l to the lysate,  
 256 followed by TruSeq Small RNA Library Prep sequencing. Based on these sequencing data, a  
 257 separate RC spike-in and LP spike-in pool was created, in which each RNA control is diluted  
 258 at a different concentration, in order to correct for adaptor ligation bias during library

259 preparation. To this purpose, the RC and LP spike-in stock solutions were diluted to 5  $\mu$ M using  
260 nuclease-free water, and pooled into a ligation bias-corrected 10 pM RC spike-in pool and 10  
261 pM LP spike-in pool, respectively, using 500 nM carrier oligo. The indicated 10 pM  
262 concentration of these pools corresponds to the concentration of RC2-34, which has the  
263 highest ligation efficiency. Concentrations of the remaining spikes are relative to the RC2-34  
264 concentration (Table 3). Finally, using these ligation-bias corrected 10 pM pools and 500 nM  
265 carrier oligo, RC and LP spike-in pools were made. The final ligation bias-corrected  
266 concentration of RC spike-in pool was 1259 fM for the kit comparison study (exRNAQC011),  
267 and 191 fM for the tube comparison study (exRNAQC013) and phase 2 (exRNAQC017 small  
268 RNA sequencing). The final ligation bias-corrected concentration of LP spike-in pool was 486  
269 fM for the kit comparison study (exRNAQC011), and 34 fM for the tube comparison study  
270 (exRNAQC013) and phase 2 (exRNAQC017 small RNA sequencing). Per 100  $\mu$ l liquid biopsy  
271 input volume, 1  $\mu$ l RNA purification Control (RC) spike-ins was added to the lysate during RNA  
272 purification. LP spikes were added before gDNA removal (see main manuscript for volumes).

273

### 274 **1.3. RNA purification methods**

275 *1.3.1. The miRNeasy Serum/Plasma Kit (abbreviated to miRNeasy method (or MIR in figures*  
276 *and tables); Qiagen, 217184)*

277 All RNA purifications throughout the study are performed using the miRNeasy Serum/Plasma  
278 Kit, unless specified otherwise. For evaluation of the different exRNA purification methods,  
279 RNA purifications were performed in triplicate and 200  $\mu$ l plasma was used per RNA  
280 purification, as the manufacturer's manual indicates a maximum recommended biofluid input  
281 volume of 200  $\mu$ l; required minimum volumes are not mentioned.

282 Plasma is thawed on ice and 1000  $\mu$ l QIAzol Lysis Reagent is added to each sample. Samples  
283 are vortexed and incubated for 5 min at room temperature, followed by the addition of Sequin  
284 control spike-ins and/or RC RNA purification Control (RC) spike-ins. Subsequently, samples  
285 are vortexed and 200  $\mu$ l chloroform is added, followed by vortexing of the lysates for 15 s. After  
286 a 2 min incubation at room temperature, samples are centrifuged for 15 min at 12000 g at 4

287 °C. Next, 600 µl of the upper aqueous phase is transferred to a new collection tube on ice, to  
288 which 900 µl ethanol is pipetted. Samples are mixed by pipetting up and down, loaded (up to  
289 700 µl) on an RNeasy MinElute spin column and centrifuged for 15 s at 10000 g at room  
290 temperature. The flowthrough is discarded, and loading and centrifugation repeated using the  
291 remainder of the samples. Afterwards, 700 µl RWT buffer is added to the column and samples  
292 are centrifuged for 15 s at 10000 g. Flowthroughs are discarded and 500 µl RPE buffer is  
293 pipetted onto the columns, followed by centrifugation for 15 s at 10000 g. Again, flowthroughs  
294 are discarded, and 500 µl 80 % ethanol is loaded onto the columns. Samples are centrifuged  
295 for 2 min at 10000 g, and afterwards, the columns are placed into a new collection tube (with  
296 open lid) and dried for 5 min at full speed (16900 g). Finally, the columns are placed in a new  
297 collection tube, 14 µl RNase-free water (Sigma, W4502) is added to the center of the column  
298 membrane, and RNA is eluted by centrifugation for 1 min at full speed.

299

300 *1.3.2. The miRNeasy Serum/Plasma Advanced Kit (abbreviated to miRNeasy Advanced*  
301 *method (or MIRA in figures and tables); Qiagen, 217204)*

302 For evaluation of the different exRNA purification methods, RNA purifications were performed  
303 in triplicate, and a minimum and maximum input volume of 200 µl and 600 µl plasma was used,  
304 respectively. In phase 2, 600 µl plasma input volume was used.

305 Plasma is thawed on ice and 60 µl Buffer RPL is added per 200 µl of plasma input volume.  
306 Samples are vortexed for 5 s and left at room temperature for 3 min, followed by the addition  
307 of Sequin control spike-ins and/or RC RNA purification Control (RC) spike-ins. Per 200 µl  
308 plasma input volume, 20 µl RPP Buffer is added. Samples are vortexed for >20 s, incubated  
309 at room temperature for 3 min, and centrifuged at 12000 g for 3 min. Per 200 µl plasma input  
310 volume, 220 µl of the clear and colourless supernatant is transferred to a new tube and 1  
311 volume of isopropanol is added, and tubes are vortexed. The entire sample (up to 700 µl) is  
312 transferred to a RNeasy UCP MinElute column and centrifuged for 15 s at 10000 g, and loading  
313 and centrifugation repeated with the remainder of the samples (only for the maximum plasma  
314 input volume). Flowthroughs are discarded and 700 µl Buffer RWT is added onto the column.

315 Columns are again centrifuged for 15 s at 10000 g and flowthroughs discarded. Next, 500 µl  
316 buffer RPE is added onto the column and samples are centrifuged for 15 s at 10000 g.  
317 Flowthroughs are discarded and 500 µl 80 % ethanol is added to the column. Columns are  
318 centrifuged for 2 min at 10000 g and placed in a new collection tube. Columns are centrifuged  
319 at full speed (16900 g) for 5 min, with open lid to dry the membrane. Dry columns are placed  
320 in a new 1.5 ml collection tube and 20 µl RNase-free water (Sigma, W4502) is added directly  
321 to the center of the spin column membrane and incubated for 1 min. Next, columns are  
322 centrifuged for 1 min at full speed (16900 g) to elute the RNA.

323

324 *1.3.3. The mirVana PARIS Kit (abbreviated to mirVana method (or MIRV and MIRVE in*  
325 *figures and tables); Life Technologies, AM1556)*

326 For evaluation of the different exRNA purification methods, RNA purifications were performed  
327 in triplicate, and a minimum and maximum biofluid input volume of 100 µl and 625 µl was used,  
328 respectively. Although not explicitly stated by the manufacturer, the minimum input volume  
329 was set on 100 µl based on the manufacturer's indication that smaller sample volumes need  
330 to be diluted to 100 µl with Cell Disruption Buffer.

331 Plasma is thawed on ice and added to an equal volume of 2x Denaturing Solution at room  
332 temperature. This mixture is incubated for 5 min on ice and Sequin control spike-ins and/or RC  
333 RNA purification Control (RC) spike-ins are added, followed by adding a volume of Acid-  
334 Phenol:Chloroform equal to the total lysate volume. Samples are mixed by vortexing for 60 s  
335 and centrifuged for 5 min at 10000 g at room temperature to separate the mixture into aqueous  
336 and organic phases. The aqueous phase (i.e. 140 µl and 650 µl for the minimum and plasma  
337 input volume, respectively) is recovered and transferred to a fresh tube. Subsequently, 1.25  
338 volumes of 100 % ethanol are added to the aqueous phase, and the mixed sample (up to 700  
339 µl) is pipetted onto a Filter Cartridge and centrifuged for 30 s (all centrifugation steps are at  
340 10000 g). Flowthroughs are discarded, and loading on the Filter Cartridge and centrifugation  
341 repeated using the remainder of the samples. Filter Cartridges are washed by applying 700 µl  
342 miRNA Wash Solution 1 and centrifuging for 15 s. The flowthrough is discarded. Next, samples

343 are washed twice by applying 500 µl Wash Solution 2/3 and centrifuging for 15 s. After  
344 discarding the flowthrough from the last wash, the Filter Cartridge is replaced in the Collection  
345 Tube and spun for 1 min to remove residual fluid from the filter. To elute the RNA, 100 µl of  
346 preheated Elution Solution is pipetted to the center of the filter, placed in a new Collection  
347 Tube, and samples are centrifuged for 30 s.

348 For evaluation of the different exRNA purification methods for miRNA sequencing, also an  
349 alternative protocol claiming to enrich for small RNAs (abbreviated to MIRVE in figures and  
350 tables) was tested. The first steps are identical to the purification protocol described above.  
351 After recovering the aqueous phase, 1/3 volume of 100 % ethanol is added and mixed with the  
352 lysate. Then, the mixture (up to 700 µl) is pipetted onto a Filter Cartridge and centrifuged for  
353 30 s. The filtrate is transferred to a fresh tube. These steps are repeated with the remainder of  
354 the sample. Filtrates are pooled and the total volume of filtrate is determined. Next, 2/3 volume  
355 of room temperature 100 % ethanol is added to the filtrate, and the sample is mixed thoroughly.  
356 This mixture is passed through a second Filter Cartridge. This time, the flowthrough is  
357 discarded, and the Filter Cartridge is washed and RNA eluted as described for the purification  
358 protocol above.

359

360 *1.3.4. The NucleoSpin miRNA Plasma Kit (abbreviated to NucleoSpin method (or NUC in*  
361 *figures and tables); Macherey-Nagel, 740981.50)*

362 For evaluation of the different exRNA purification methods, RNA purifications were performed  
363 in triplicate, and a minimum and maximum biofluid input volume of 300 µl and 900 µl was used,  
364 respectively.

365 Plasma is thawed on ice and 90 µl MLP Buffer per 300 µl input volume is added. Samples are  
366 vortexed for 5 s and incubated for 3 min at room temperature. Sequin control spike-ins and/or  
367 RC RNA purification Control (RC) spike-ins are added to the lysate. Next, 30 µl MPP Buffer  
368 per 300 µl plasma input volume is added. Samples are vortexed for 5 s, incubated for 1 min at  
369 room temperature and centrifuged for 3 min (all centrifugation steps are at 11000 g). The clear  
370 supernatant (i.e. 250 µl and 1100 µl for the minimum and maximum input volume, respectively)

371 is transferred into a new Collection Tube and per 300 µl plasma input volume 400 µl  
372 isopropanol is added. Samples are vortexed for 5 s, loaded onto a NucleoSpin miRNA Column,  
373 incubated for 2 min at room temperature and centrifuged for 30 s. Flowthroughs are discarded  
374 and loading repeated with the remainder of the samples. Next, the columns are washed by  
375 adding 100 µl Buffer MW1 and centrifuging for 30 s. Flowthroughs are discarded and columns  
376 washed a second and third time by adding 700 µl Buffer MW2 and centrifuging for 30 s, and  
377 adding 250 µl Buffer MW2 and centrifuging for 2 min, respectively. Subsequently, the column  
378 is placed into a new Collection Tube, and 30 µl RNase-free water (Sigma, W4502) pipetted  
379 onto the silica membrane. Samples are incubated for 1 min at room temperature and  
380 centrifuged for 1 min to elute the RNA.

381

382 *1.3.5. The QIAamp ccfDNA/RNA Kit (abbreviated to QIAamp method (or QIA in figures and*  
383 *tables); Qiagen, 55184)*

384 For evaluation of the different exRNA purification methods, RNA purifications were performed  
385 in triplicate, and a minimum and maximum input volume of 1000 µl and 4000 µl plasma was  
386 used, respectively. In phase 2, 2000 µl plasma input volume was used.

387 Plasma is thawed on ice, transferred to a 15 ml collection tube and 300 µl Buffer RPL is added  
388 for each 1000 µl of plasma. Samples are vortexed for 5 s and left at room temperature for 3  
389 min, followed by the addition of Sequin control spike-ins and/or RC RNA purification Control  
390 (RC) spike-ins. Per 1000 µl plasma input volume, 100 µl Buffer RPP is added. Samples are  
391 vortexed for >20 s and incubated on ice for 3 min. Proteins are precipitated by centrifuging the  
392 samples at 3000 g for 10 min. The clear and colourless supernatant (i.e. 1100 µl and 4400 µl  
393 for the minimum and maximum plasma input volume, respectively) is transferred to a new tube  
394 (on ice), 1 volume of ice-cold isopropanol is added and the tubes are vortexed. Up to 4000 µl  
395 sample is transferred to an RNeasy Midi spin column and the column is centrifuged at room  
396 temperature for 1 min at 3000 g. Flowthroughs are discarded, and loading repeated with the  
397 remainder of the samples. Next, 4000 µl Buffer RWT is added to the column. Columns are  
398 centrifuged for 1 min at 3000 g and flowthroughs are discarded, followed by the addition of

399 2500 µl Buffer RPE and centrifugation for 5 min at 3000 g. After placing the columns into a  
400 new 15 ml collection tube, 200 µl RNase-free water (Sigma, W4502) is added directly to the  
401 center of the membrane and columns are incubated for 1 min. Next, columns are centrifuged  
402 for 1 min at full speed (4500 g) to elute the RNA. Subsequently, 200 µl Buffer RPL and 800 µl  
403 100 % ethanol are added to the eluate and samples are mixed by pipetting up and down. Up  
404 to 700 µl sample is pipetted onto an RNeasy MinElute spin column. Columns are centrifuged  
405 at 10000 g for 15 s at room temperature, flowthroughs discarded and loading repeated with  
406 the remainder of the samples. Subsequently, 500 µl Buffer RPE is pipetted onto the column,  
407 followed by centrifuging the columns for 15 sec at 10000g. Flowthroughs are discarded and  
408 500 µl 80 % ethanol is added to the columns. The columns are again centrifuged for 15 s at  
409 10 000 g and placed in a fresh collection tube, followed by centrifugation for 5 min at full speed  
410 (16900 g), with open lid to dry the membrane. Then, the columns are placed in a new 1.5 ml  
411 collection tube and 14 µl RNase free water (Sigma, W4502) is added directly to the center of  
412 the spin column membrane. Finally, columns are centrifuged for 1 min at full speed (16900 g)  
413 to elute the RNA.

414

415 *1.3.6. The Plasma/Serum Circulating and Exosomal RNA Purification Kit/Slurry Format*  
416 *(abbreviated to Norgen method (or NOR in figures and tables); Norgen Biotek Corp., 42800)*

417 For evaluation of the different exRNA purification methods, RNA purifications were performed  
418 in triplicate, and a minimum and maximum biofluid input volume of 250 µl and 5000 µl was  
419 used, respectively. Note that depending on the plasma input volume that is used, the  
420 manufacturer's manual instructs to use different volumes of Lysis Buffer A and 100 % ethanol.  
421 Here, we provide the protocol to specifically process 250 µl plasma. Adjusted volumes to  
422 process 5000 µl plasma are indicated between brackets. In addition, note that in the  
423 manufacturer's manual centrifugation speeds are quoted in rpm. The indicated speeds thus  
424 depend on the radius of the centrifuge rotor. Here, a Centrifuge 5804 (Eppendorf, 5804000013)  
425 with Rotor A-4-44 (Eppendorf, 5804709004) was used at the start of the protocol. As soon as  
426 samples were loaded onto spin columns (see protocol below), centrifugation steps were

427 performed using a Centrifuge 5424R (Eppendorf, 5404000618) with Rotor FA-45-24-11  
428 (Eppendorf, 5424700004).

429

430 Plasma is thawed on ice and 200  $\mu$ l Slurry C2 and 300  $\mu$ l (9800  $\mu$ l) Lysis Buffer A is added.  
431 Samples are mixed by vortexing for 15 s. After incubation for 10 min at 60 °C, Sequin control  
432 spike-ins and/or RC RNA purification Control (RC) spike-ins are added, as well as 750  $\mu$ l  
433 (15000  $\mu$ l) 100 % ethanol, and samples are vortexed for 15 s, followed by centrifugation for 30  
434 s at 1000 RPM (all centrifugation steps are at room temperature). The supernatant is carefully  
435 decanted and 300  $\mu$ l Lysis Buffer A is added to the pellet. Samples are mixed well by vortexing  
436 for 15 s and incubated for 10 min at 60 °C. Then, 300  $\mu$ l 100 % ethanol is added and the  
437 mixture is vortexed for 15 s. Next, the samples (up to 650  $\mu$ l) are loaded onto a Mini Filter Spin  
438 column and centrifuged for 1 min at 14000 RPM. Flowthroughs are discarded. This loading  
439 and centrifugation step is repeated with the remainder of the samples. Subsequently, 400  $\mu$ l  
440 Wash Solution A is applied to the column, followed by centrifugation for 1 minute at 14000  
441 RPM and discarding the flowthrough. This wash step is repeated two more times, for a total of  
442 three washes. Columns are spun empty, for 3 min at 14000 RPM and transferred to a fresh  
443 Elution tube. To elute the RNA, 100  $\mu$ l Elution Solution A is applied to the column and samples  
444 are centrifuged for 2 min at 2000 RPM, followed by 3 min at 14000 RPM.

445

446 *1.3.7. The Maxwell RSC miRNA Plasma and Serum Kit (Promega, custom catalog AX5740,*  
447 *AS1680) in combination with the Maxwell RSC Instrument (abbreviated to Maxwell method (or*  
448 *MAX in figures and tables); Promega, AS4500)*

449 For evaluation of the different exRNA purification methods, RNA purifications were performed  
450 in triplicate, and a minimum and maximum biofluid input volume of 100  $\mu$ l and 500  $\mu$ l was used,  
451 respectively. At the time the exRNAQC study was set up, the Maxwell RSC miRNA Plasma  
452 and Serum Kit was not yet commercially available, and purifications were performed using  
453 custom catalog number AX5740, received from the company. To test the interactions between  
454 pre-analytics, the commercially available kit (AS1680) was used. Note that these two versions

455 of the kit have similar components, except for the Maxwell RSC cartridges. The difference  
456 between cartridges is that the commercially available cartridge (AS1680) uses a newer  
457 magnetic purification cellulose resin and seal stock material (e-mail communication Promega).  
458

459 Protocol AX5740

460 Plasma is thawed on ice and 80 µl Proteinase K and 230 µl Binding Buffer is added. Samples  
461 are vortexed for 10 s and incubated for 15 min at 37 °C. During this incubation step, the RSC  
462 Cartridges are prepared as follows. The cartridges are placed in the RSC deck trays with well  
463 #1 facing away from the Elution Tubes, and snapped into position by pressing down on the  
464 cartridges. Seals are removed and a RSC Plunger is placed into well #8 of each cartridge.  
465 Sequin control spike-ins and/or RC RNA purification Control (RC) spike-ins are added to well  
466 #1 and 50 µl Nuclease-Free Water to each Elution Tube. After the incubation step, the lysate  
467 is added to well #1. Subsequently samples are loaded onto the instrument and the automated  
468 purification run is started according to the Maxwell RSC miRNA method.

469

470 Protocol AS1680

471 Plasma is thawed on ice and 80 µl Proteinase K and 230 µl Lysis Buffer C is added. Samples  
472 are vortexed for 5 s and incubated for 15 min at 37 °C. During this incubation step, the RSC  
473 Cartridges are prepared as follows. The cartridges are placed in the RSC deck trays with well  
474 #1 facing away from the Elution Tubes, and snapped into position by pressing down on the  
475 cartridges. Seals are removed and a RSC Plunger is placed into well #8 of each cartridge.  
476 Sequin control spike-ins and/or RC RNA purification Control (RC) spike-ins are added to well  
477 #1 and 50 µl Nuclease-Free Water to each Elution Tube. After the incubation step, the lysate  
478 is added to well #1. Subsequently samples are loaded onto the instrument and the automated  
479 purification run is started according to the miRNA Plasma and Serum method.

480

481 *1.3.8. The MagNA Pure 24 Total NA Isolation Kit (Roche, 07658036001) in combination with*  
482 *the MagNA Pure 24 instrument (abbreviated to MagNA Pure method (or MAP in figures and*

483 *tables*); Roche, 07290519001)

484 For evaluation of the different exRNA purification methods, a minimum and maximum biofluid  
485 input volume of 2000 µl and 4000 µl was used, respectively. As recommended by the  
486 manufacturer, we made use of the cfNA ss 2000 protocol for 2000 µl samples and the cfNA ss  
487 4000 protocol for 4000 µl samples.

488 Plasma is thawed on ice and aliquoted in volumes of 1050 µl into 1.5 ml microcentrifuge tubes.  
489 To each tube, 105 µl proteinase K is added and samples are incubated for 20 min at 37 °C.  
490 After incubation, 1000 µl of each microcentrifuge tube is pooled into a Falcon round bottomed  
491 test tube (VWR, 734-0446) to obtain 2000 µl and 4000 µl input volumes. Next, cfNA buffer mix  
492 is prepared in bulk by mixing 1750 µl Cell-Free Nucleic Acid Enhancement Buffer (CELB) with  
493 300 µl Isopropanol (IPA) per 2000 µl sample. Of this cfNA buffer mix, 2000 µl and 4000 µl is  
494 added to the 2000 µl and 4000 µl input samples, respectively, followed by the addition of  
495 Sequin control spike-ins and/or RC RNA purification Control (RC) spike-ins. Samples are  
496 thoroughly mixed by dispensing and aspirating the liquid 8 times to produce a homogeneous  
497 mixture, and centrifuged at 1400 g for 1 minute. Remaining bubbles were removed with the  
498 back of a tip. The MagNA Pure 24 instrument was loaded as described in the manufacturer's  
499 manual and samples were eluted in 50 µl.

500

#### 501 **1.4. RNA concentration measurements**

502 Eluate RNA concentrations are measured using the Femto Pulse system (Agilent  
503 Technologies, M5330AA) with the Ultra Sensitivity RNA Kit (Agilent Technologies, FP-1201-  
504 0275) according to the manufacturer's instructions.

505

## 506 **2. Supplementary Results**

### 507 **2.1. MagNA Pure purification co-purifies DNA and is incompatible with the applied** 508 **genomic DNA removal strategy**

509

510 To ensure accurate extracellular RNA quantification, we first investigated potential DNA  
511 contamination in the RNA eluates using the strandedness of the mRNA capture sequencing  
512 data, as in the absence of DNA contamination strandedness should be close to 100%.  
513 Strandedness for the MagNA Pure method, however, was considerably lower, with only 70-  
514 85% of reads mapping to the correct strand, while this percentage was above 95% for all other  
515 purification methods (Supplementary Fig. S1c). Moreover, the miRNA sequencing data from  
516 this purification method contained a much higher fraction of mapped reads that did not overlap  
517 annotated small RNA sequences (35 to 52% of mapped reads for MagNA Pure purification  
518 compared to only 1 to 6% for the other purification methods) and more than 80% of these  
519 unannotated reads did not overlap with known exons. These findings suggest that MagNA  
520 Pure purification co-purifies genomic DNA (gDNA) that cannot be adequately removed using  
521 HL-dsDNase-based gDNA removal. As a consequence, the MagNA Pure method was  
522 excluded from further analyses.

523

### 524 **3. References**

525 Hafner M, Renwick N, Brown M, Mihailović A, Holoch D, Lin C, Pena JTG, Nusbaum JD,  
526 Morozov P, Ludwig J, Ojo T, Luo S, Schroth G, Tuschl T. RNA-ligase-dependent biases in  
527 miRNA representation in deep-sequenced small RNA cDNA libraries. *RNA*. 2011; 17(9):1697-  
528 712.

529

530 Locati MD, Terpstra I, de Leeuw WC, Kuzak M, Rauwerda H, Ensink WA, van Leeuwen S,  
531 Nehrdich U, Spaink HP, Jonker MJ, Breit TM, Dekker RJ. Improving small RNA-seq by using  
532 a synthetic spike-in set for size-range quality control together with a set for data normalization.  
533 *Nucleic Acids Res*. 2015; 43(14):e89.

534

535
