# Supplementary material for: Blood collection tube and RNA purification method recommendations for extracellular RNA transcriptome profiling: A large-scale pre-analytical variable performance evaluation
Source: Research Square preprint supplement (doi:10.21203/rs.3.rs-2409038/v2), 2024-07-22
Supplement: Supplementary file 9 [file 6e1e5540ac511e0a3adc5e92.pdf]

# Supplementary Fig. S8.

a

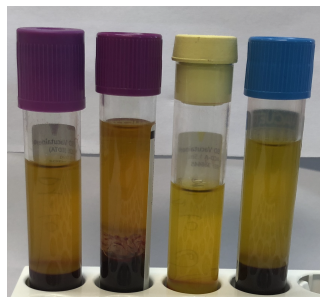

EDTA

EDTA separator

ACD-A

Citrate

b

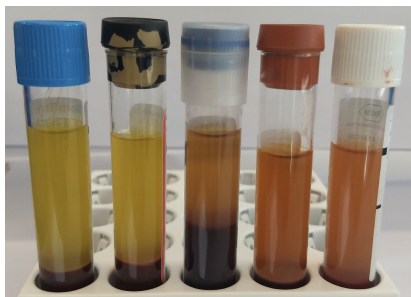

Biomatrixa

DNA Streck

PAXgene

RNA Streck

Roche

**Supplementary Fig. S8: Example of hemolysis in *preservation* tubes.** Visual inspection of classic plasma tubes (a) of donor 7 (Supplementary Fig. S6a and Supplementary Fig. S7a) and of *preservation* plasma tubes (b) of donor 5 (Supplementary Fig. S6a and Supplementary Fig. S7a) at time interval T0. For donor 5, plasma from the *PAXgene*, *RNA Streck* and *Roche* tube showed to be hemolytic, which is in line with the NanoDrop measurements (Supplementary Fig. S6a and Supplementary Fig. S7a).
