# Supplementary material for: Blood collection tube and RNA purification method recommendations for extracellular RNA transcriptome profiling: A large-scale pre-analytical variable performance evaluation
Source: Research Square preprint supplement (doi:10.21203/rs.3.rs-2409038/v2), 2024-07-22
Supplement: Supplementary file 13 [file cbb551a16e870f05b951ec69.pdf]

Supplementary Fig. S16.

tube citrate EDTA serum

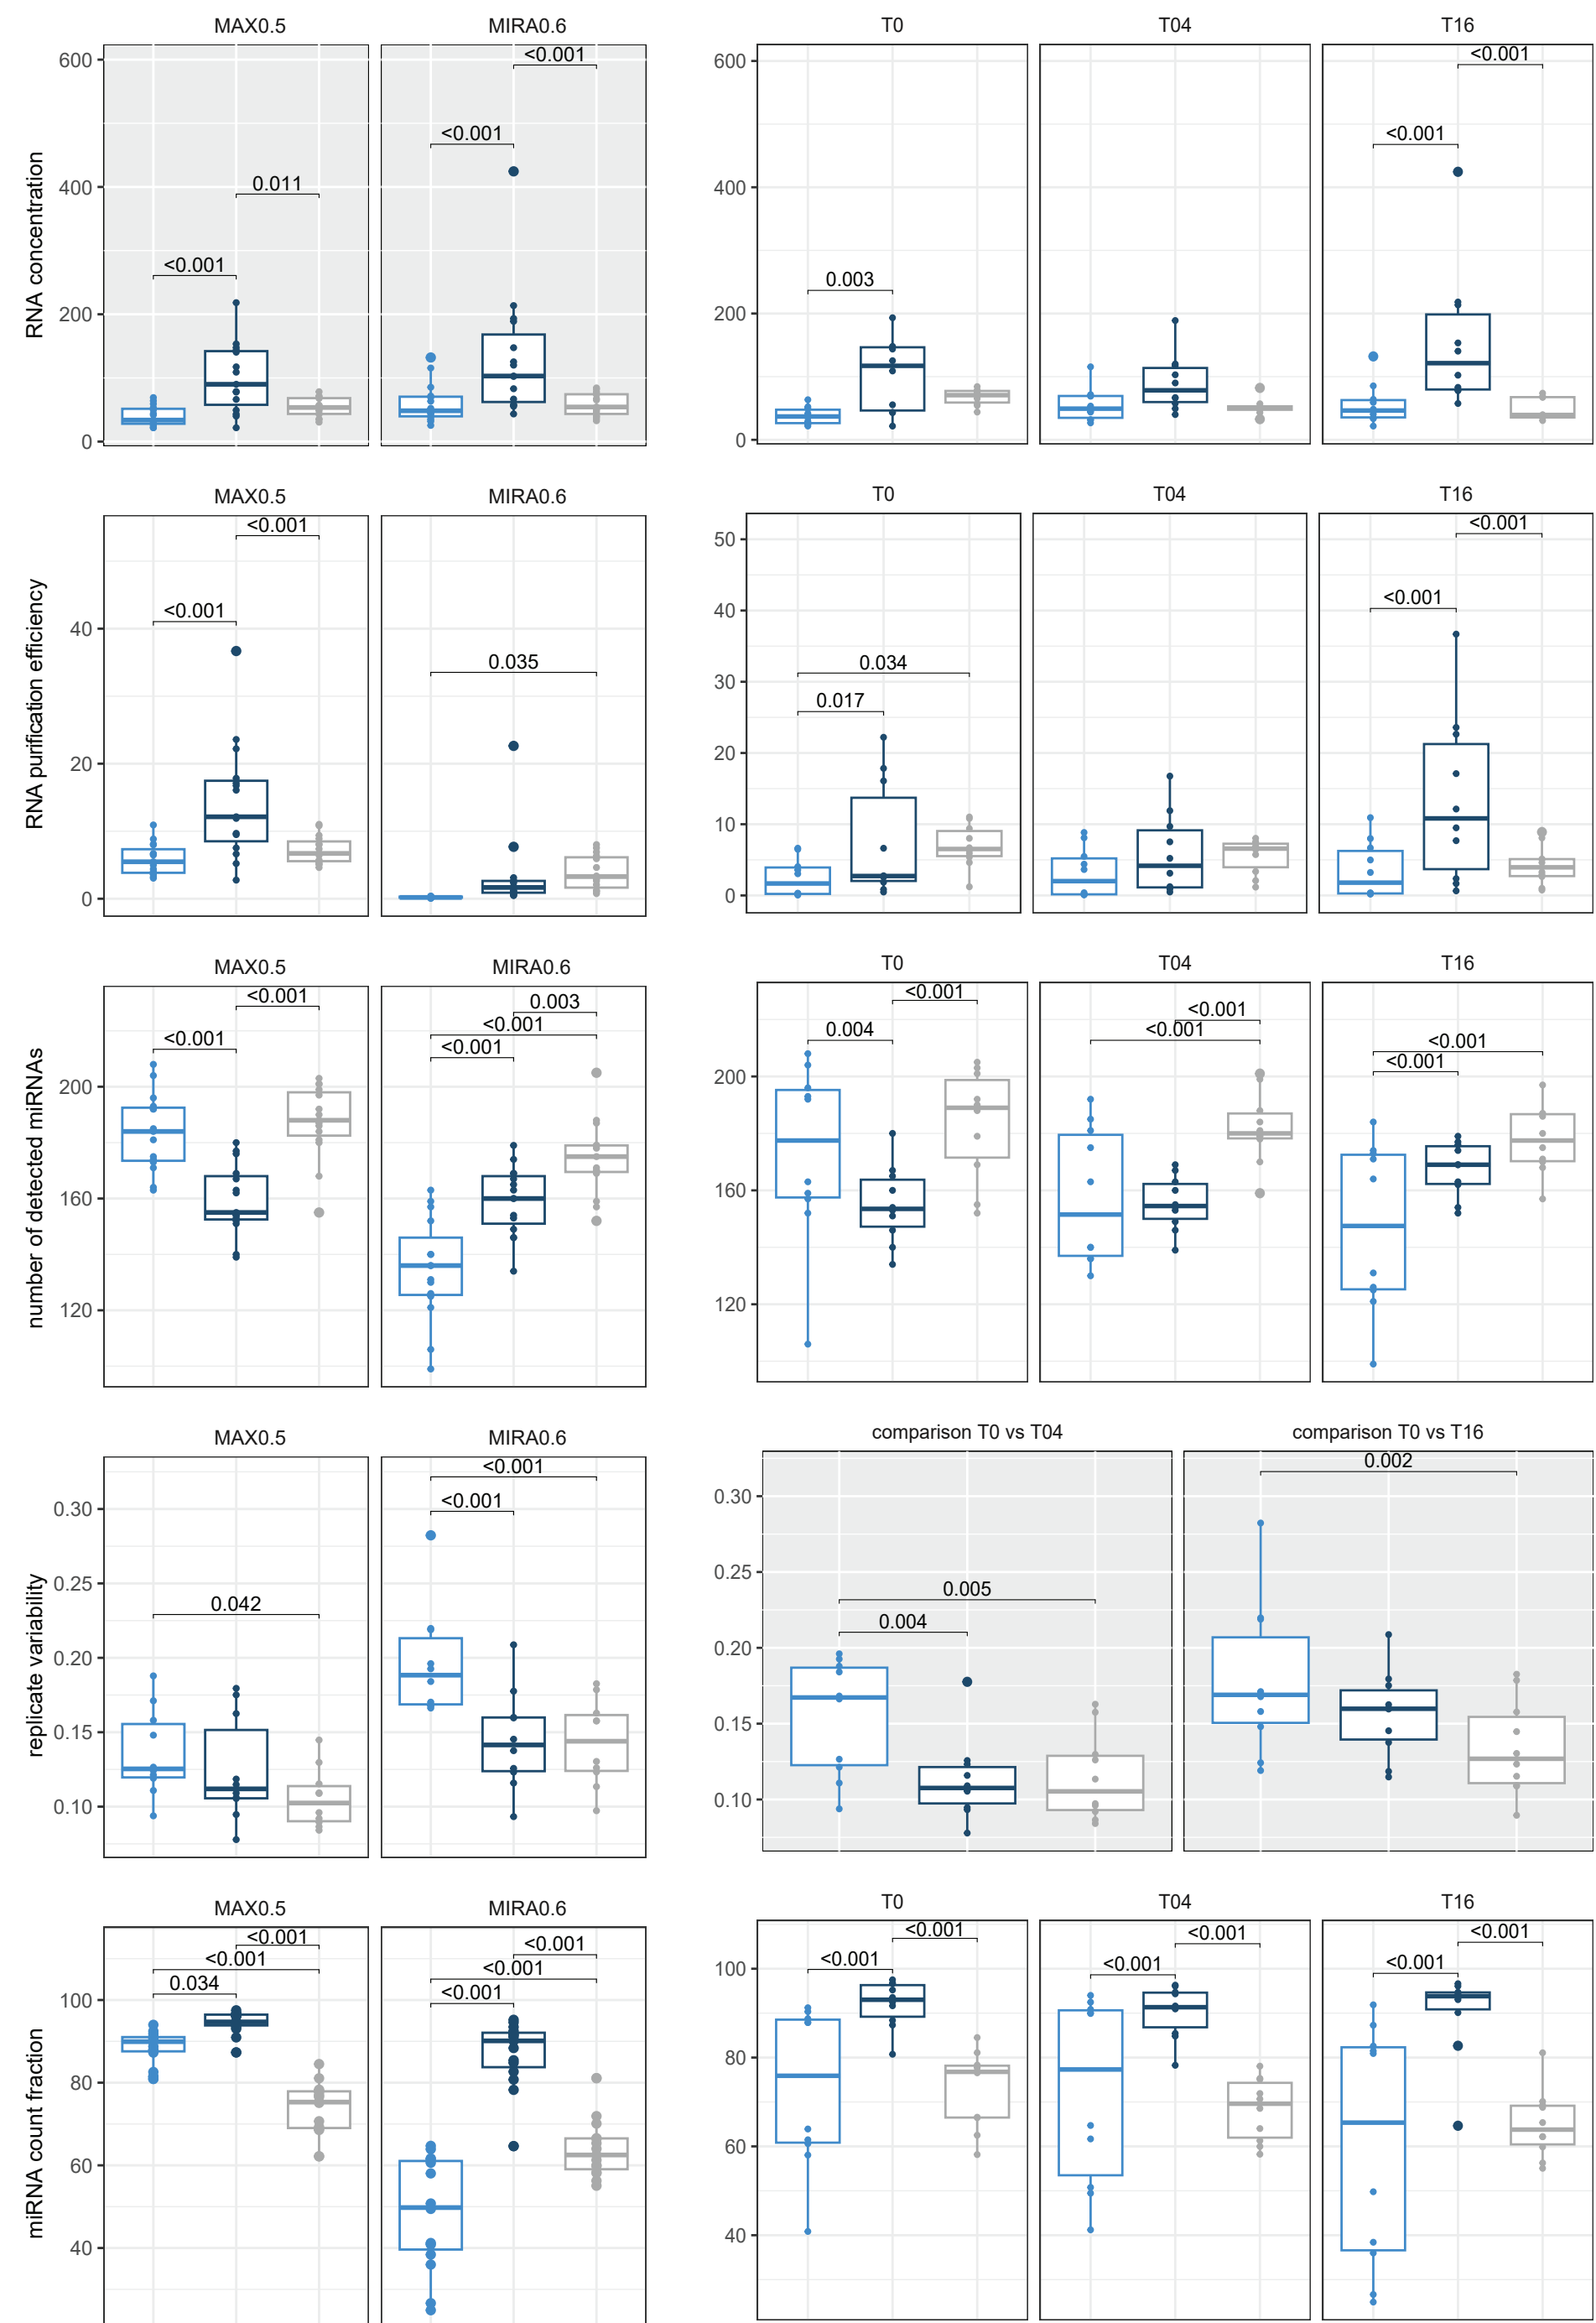

**Supplementary Fig. S16: Interaction effects of RNA purification methods and time intervals on blood collection tube performance for miRNA detection.** The figure illustrates the interaction between blood collection tube (n=3), RNA purification method (n=2) and time interval (n=3) combinations (total n=90) for 5 performance metrics. Adjusted p-values were calculated using Tukey's method for comparing a family of 3 estimates. Boxplots with a grey background indicate non-significant overall interaction p-values (calculated with the Wald test for the terms in the linear mixed-effects model) for the respective performance metric. In the boxplots, the lower and upper hinge of the boxes represents the 25th and 75th percentile, respectively. The whiskers extend to the lowest and highest value that is within 1.5 times the interquartile range. Data beyond the end of the whiskers are outliers. T0=plasma prepared immediately after blood draw. T04, T16=plasma prepared 4 or 16 hours after blood draw, respectively. MAX=Maxwell method, MIRA=miRNeasy Advanced method. Numbers in the RNA purification method labels indicate the biofluid input volume.
