# Supplementary material for: Blood collection tube and RNA purification method recommendations for extracellular RNA transcriptome profiling: A large-scale pre-analytical variable performance evaluation
Source: Research Square preprint supplement (doi:10.21203/rs.3.rs-2409038/v2), 2024-07-22
Supplement: Supplementary file 14 [file d469d94aff74de6540aa288c.pdf]

Supplementary Fig. S3.

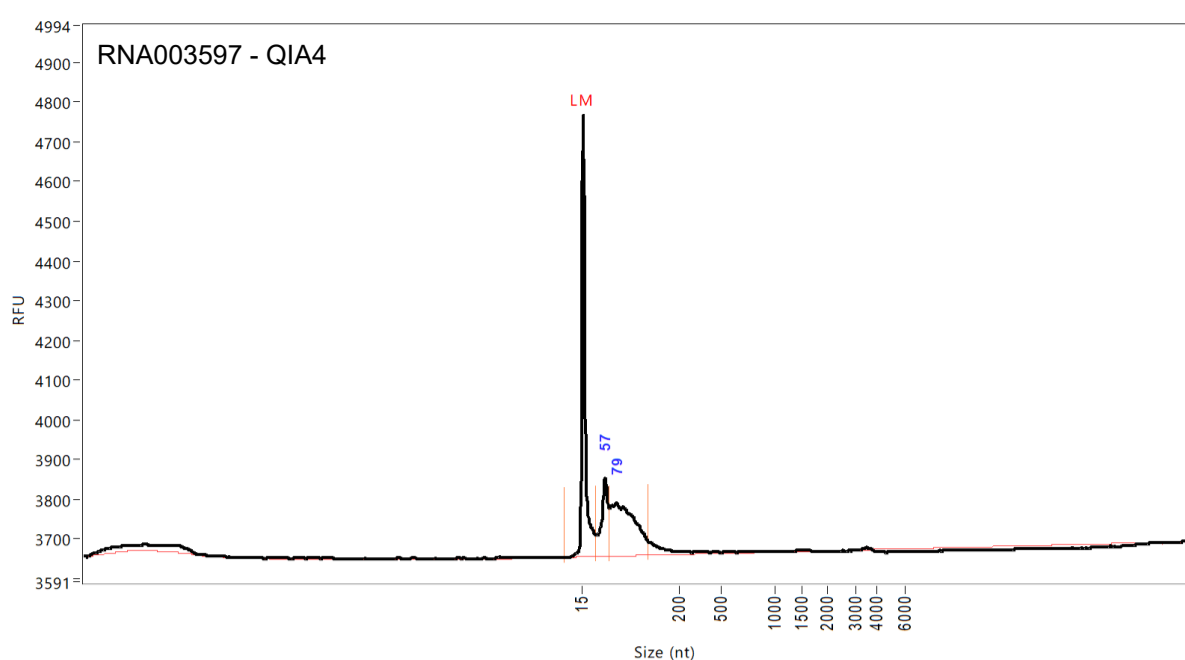

| Peak | Size (nt) | Conc. (pg/uL) | From (nt) | To (nt) | RFU  |
|------|-----------|---------------|-----------|---------|------|
| 1    | 15 (LM)   | 6.2267        | 0         | 40      | 1113 |
| 2    | 57        | 20.7608       | 40        | 66      | 195  |
| 3    | 79        | 50.1091       | 66        | 142     | 132  |

  

|              |           |         |
|--------------|-----------|---------|
| TIC:         | 70.8698   | pg/uL   |
| TIM:         | 2787.4565 | pmole/L |
| Total Conc.: | 77.1040   | pg/uL   |
| 28S/18S:     | 0.0       |         |
| RQN          | 1.2       |         |

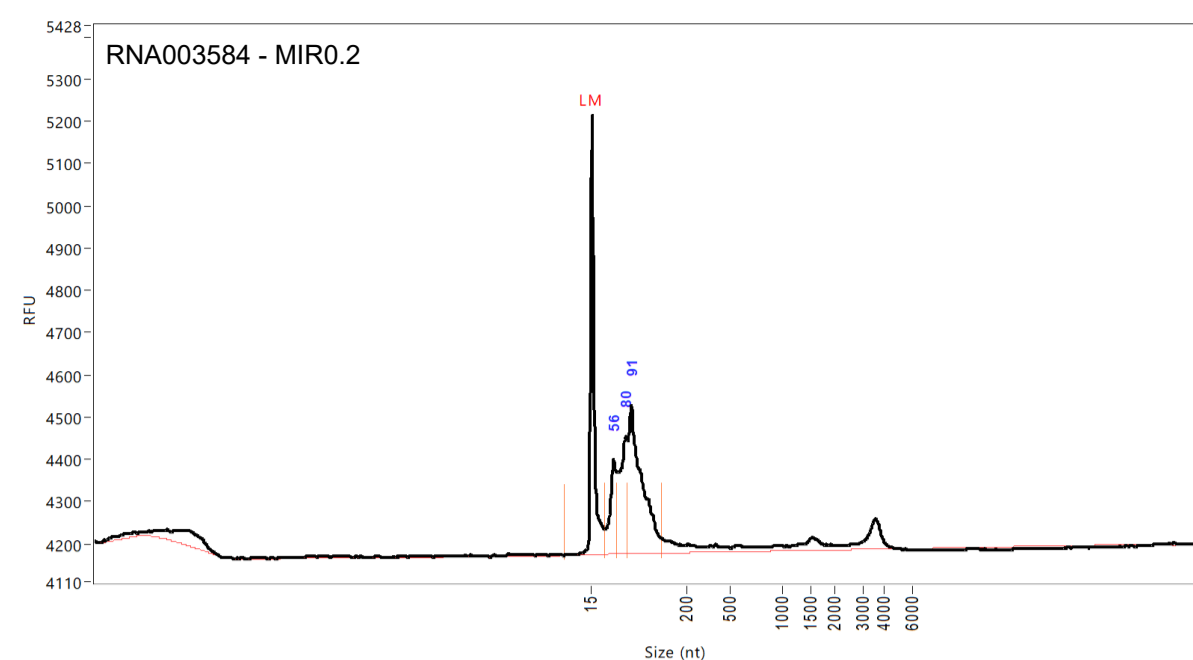

| Peak | Size (nt) | Conc. (pg/uL) | From (nt) | To (nt) | RFU  |
|------|-----------|---------------|-----------|---------|------|
| 1    | 15 (LM)   | 6.2267        | 0         | 40      | 1040 |
| 2    | 56        | 23.9809       | 40        | 63      | 222  |
| 3    | 80        | 34.2518       | 63        | 84      | 277  |
| 4    | 91        | 73.7274       | 84        | 150     | 351  |

  

|              |           |         |
|--------------|-----------|---------|
| TIC:         | 131.9601  | pg/uL   |
| TIM:         | 4967.6406 | pmole/L |
| Total Conc.: | 164.9395  | pg/uL   |
| 28S/18S:     | 0.0       |         |
| RQN          | 3.2       |         |

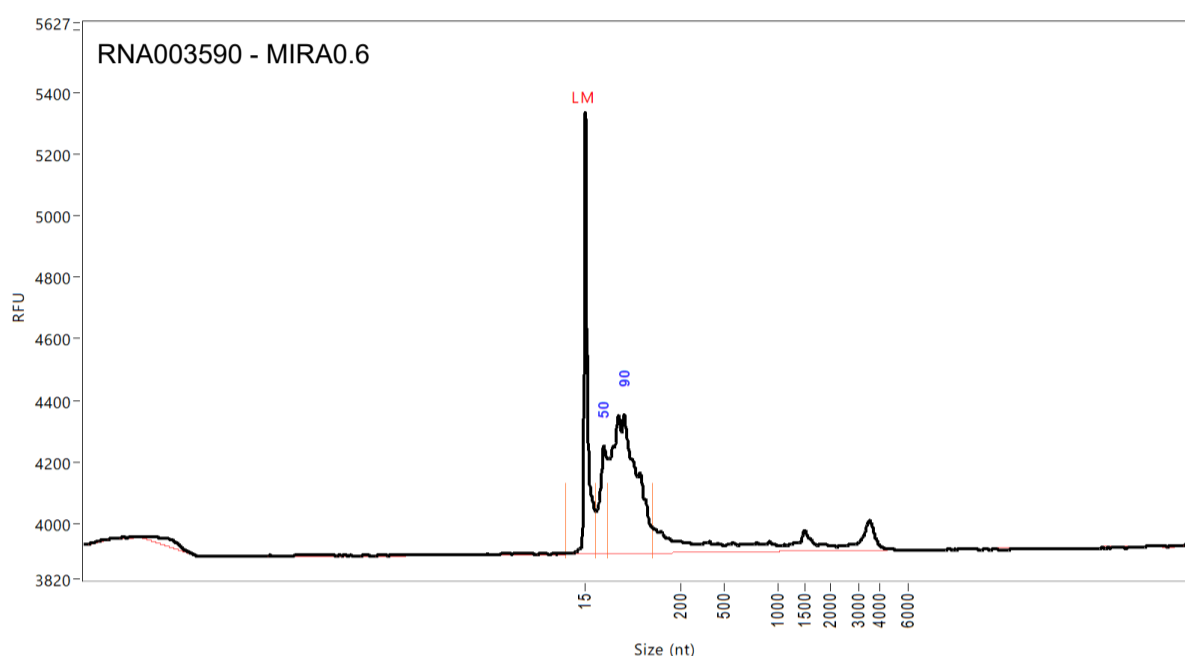

| Peak | Size (nt) | Conc. (pg/uL) | From (nt) | To (nt) | RFU  |
|------|-----------|---------------|-----------|---------|------|
| 1    | 15 (LM)   | 6.2267        | 0         | 35      | 1434 |
| 2    | 50        | 32.7797       | 35        | 60      | 348  |
| 3    | 90        | 123.2868      | 60        | 145     | 448  |

  

|              |           |         |
|--------------|-----------|---------|
| TIC:         | 156.0664  | pg/uL   |
| TIM:         | 6137.1094 | pmole/L |
| Total Conc.: | 205.0533  | pg/uL   |
| 28S/18S:     | 0.0       |         |
| RQN          | 2.4       |         |

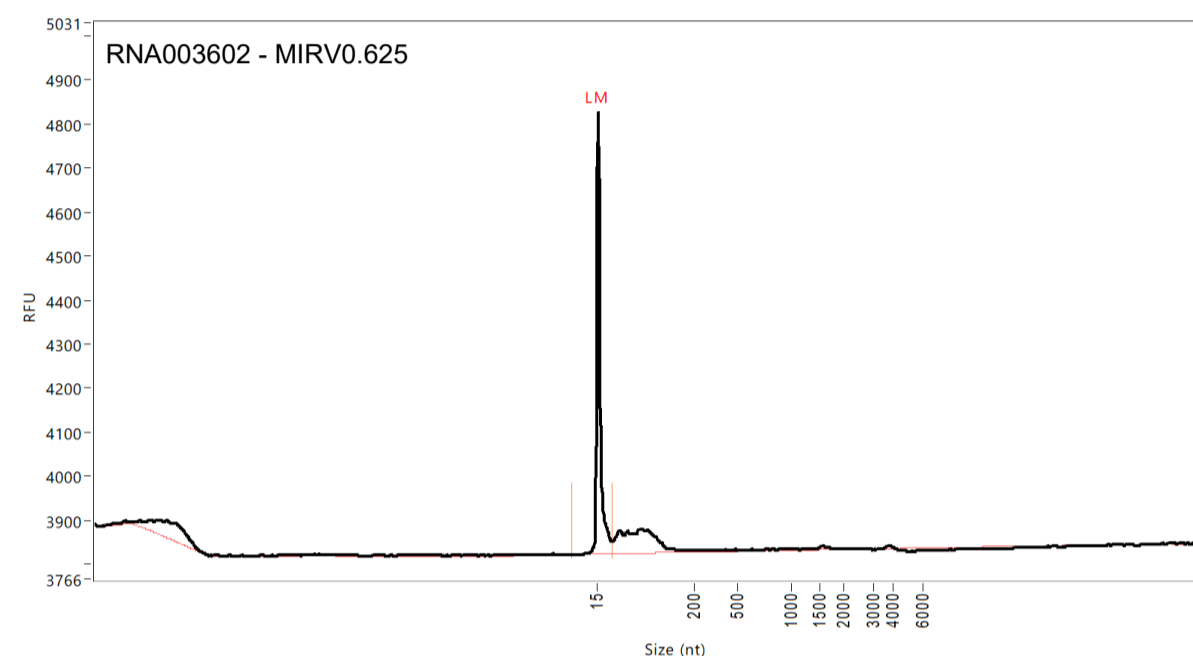

| Peak | Size (nt) | Conc. (pg/uL) | From (nt) | To (nt) | RFU  |
|------|-----------|---------------|-----------|---------|------|
| 1    | 15 (LM)   | 6.2267        | 0         | 42      | 1003 |

  

|              |         |         |
|--------------|---------|---------|
| TIC:         | 0.0000  | pg/uL   |
| TIM:         | 0.0000  | pmole/L |
| Total Conc.: | 32.1047 | pg/uL   |
| 28S/18S:     | 0.0     |         |
| RQN          | 10.0    |         |

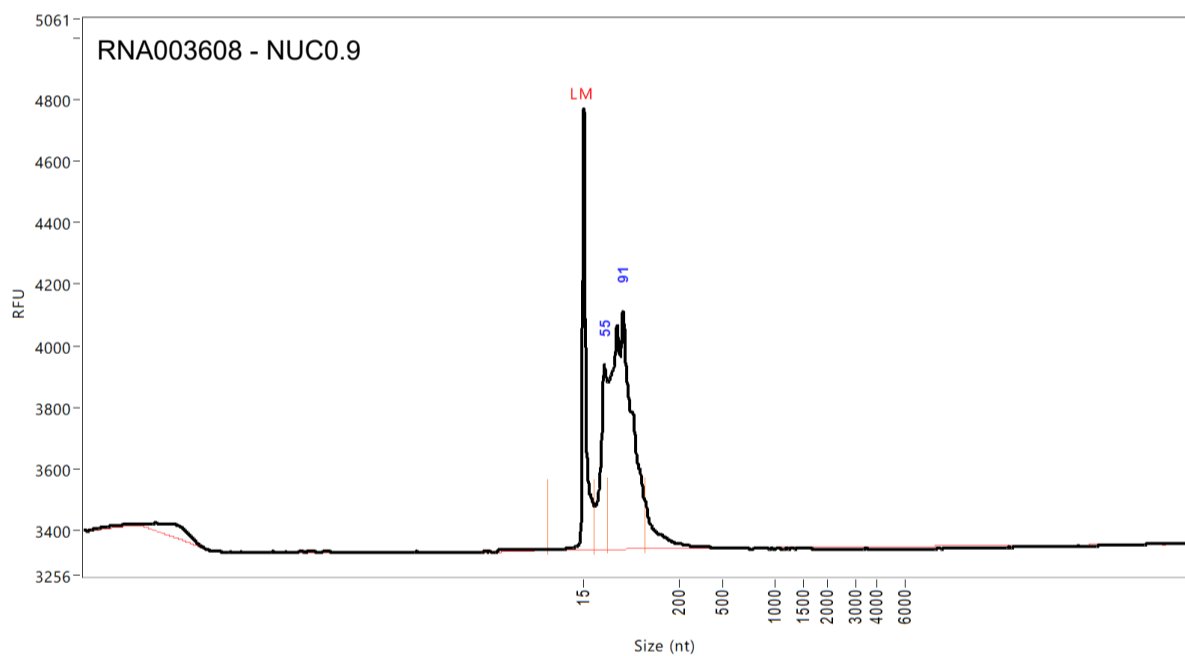

| Peak | Size (nt) | Conc. (pg/uL) | From (nt) | To (nt) | RFU  |
|------|-----------|---------------|-----------|---------|------|
| 1    | 15 (LM)   | 6.2267        | 0         | 37      | 1431 |
| 2    | 55        | 45.9980       | 37        | 62      | 596  |
| 3    | 91        | 173.9776      | 62        | 134     | 769  |

  

|              |           |         |
|--------------|-----------|---------|
| TIC:         | 219.9756  | pg/uL   |
| TIM:         | 8666.7471 | pmole/L |
| Total Conc.: | 233.0036  | pg/uL   |
| 28S/18S:     | 0.0       |         |
| RQN          | 1.0       |         |

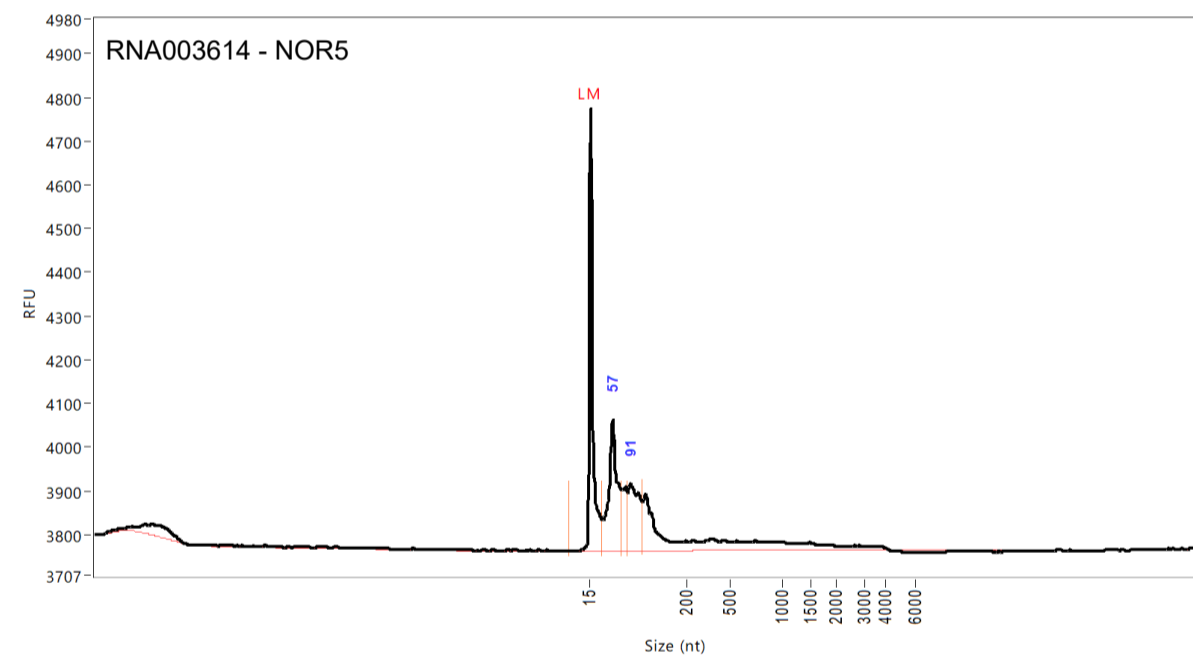

| Peak | Size (nt) | Conc. (pg/uL) | From (nt) | To (nt) | RFU  |
|------|-----------|---------------|-----------|---------|------|
| 1    | 15 (LM)   | 8.3737        | 0         | 38      | 1011 |
| 2    | 57        | 62.2613       | 38        | 75      | 297  |
| 3    | 91        | 37.7524       | 87        | 114     | 151  |

  

|              |           |         |
|--------------|-----------|---------|
| TIC:         | 100.0137  | pg/uL   |
| TIM:         | 4493.0649 | pmole/L |
| Total Conc.: | 193.0621  | pg/uL   |
| 28S/18S:     | 0.0       |         |
| RQN          | 1.5       |         |

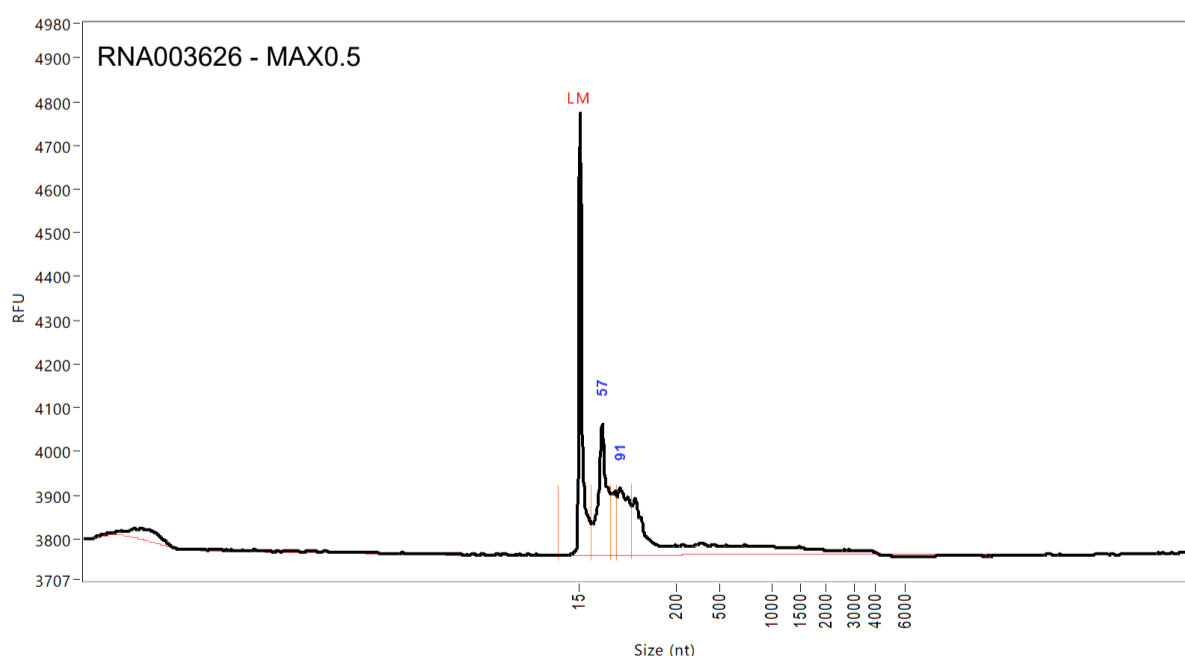

| Peak | Size (nt) | Conc. (pg/uL) | From (nt) | To (nt) | RFU  |
|------|-----------|---------------|-----------|---------|------|
| 1    | 15 (LM)   | 8.3737        | 0         | 38      | 1011 |
| 2    | 57        | 62.2613       | 38        | 75      | 297  |
| 3    | 91        | 37.7524       | 87        | 114     | 151  |

  

|              |           |         |
|--------------|-----------|---------|
| TIC:         | 100.0137  | pg/uL   |
| TIM:         | 4493.0649 | pmole/L |
| Total Conc.: | 193.0621  | pg/uL   |
| 28S/18S:     | 0.0       |         |
| RQN          | 1.5       |         |

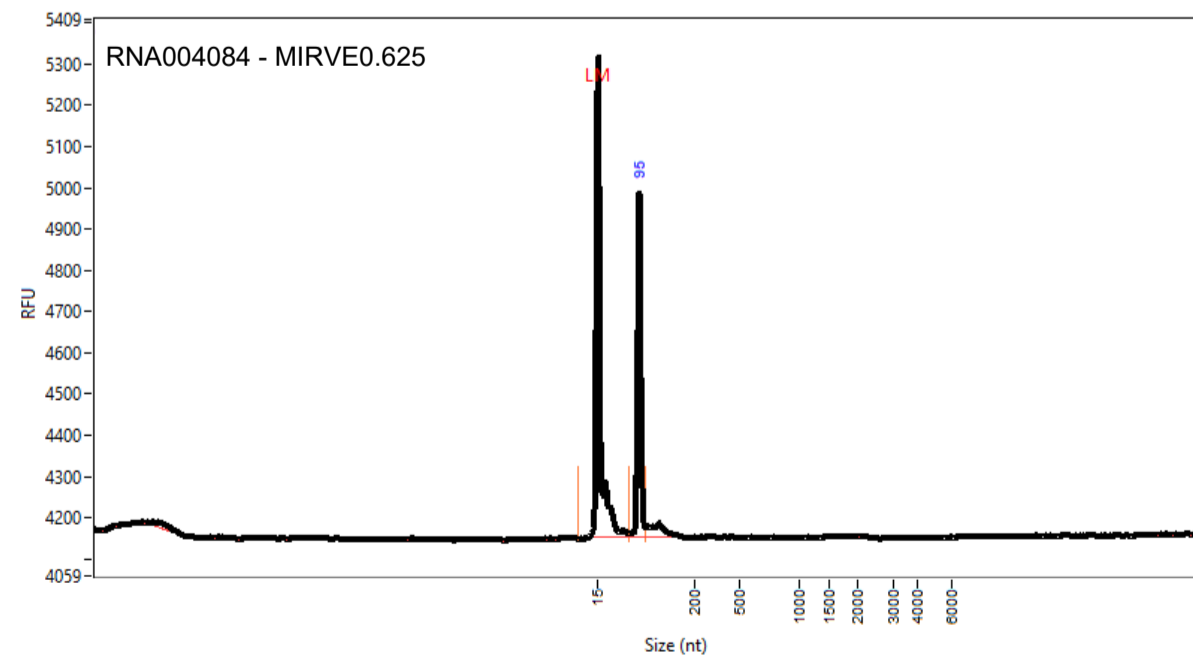

| Peak | Size (nt) | Conc. (pg/uL) | From (nt) | To (nt) | RFU  |
|------|-----------|---------------|-----------|---------|------|
| 1    | 15 (LM)   | 4.7           | 0         | 73      | 1163 |
| 2    | 95        | 25.7          | 73        | 107     | 832  |

  

|              |       |         |
|--------------|-------|---------|
| TIC:         | 25.7  | pg/uL   |
| TIM:         | 847.6 | pmole/L |
| Total Conc.: | 29.6  | pg/uL   |
| 28S/18S:     | 0.0   |         |
| RQN          | 1.0   |         |

**Supplementary Fig. S3: Extracellular RNA is highly fragmented.** For each RNA purification method, Femto Pulse results are shown for one of the triplicate RNA purifications using the maximum plasma input volume. Measurements are on DNase-treated samples (using 2  $\mu$ l sample), except for MIRVE0.625 (RNA004084, 2  $\mu$ l RNA eluate). The number in the RNA purification method labels is the plasma input volume (in ml). MAX: Maxwell method; MIR: miRNeasy method; MIRA: miRNeasy Advanced method; MIRV: mirVana method; MIRVE: mirVana method with purification protocol for RNA enriched for small RNAs; NOR: Norgen method; NUC: NucleoSpin method; QIA: QIAamp method.
