# Supplementary material for: Blood collection tube and RNA purification method recommendations for extracellular RNA transcriptome profiling: A large-scale pre-analytical variable performance evaluation
Source: Research Square preprint supplement (doi:10.21203/rs.3.rs-2409038/v2), 2024-07-22
Supplement: Supplementary file 15 [file ee6f670d224fea25bb21a343.pdf]

Supplementary Fig. S6.

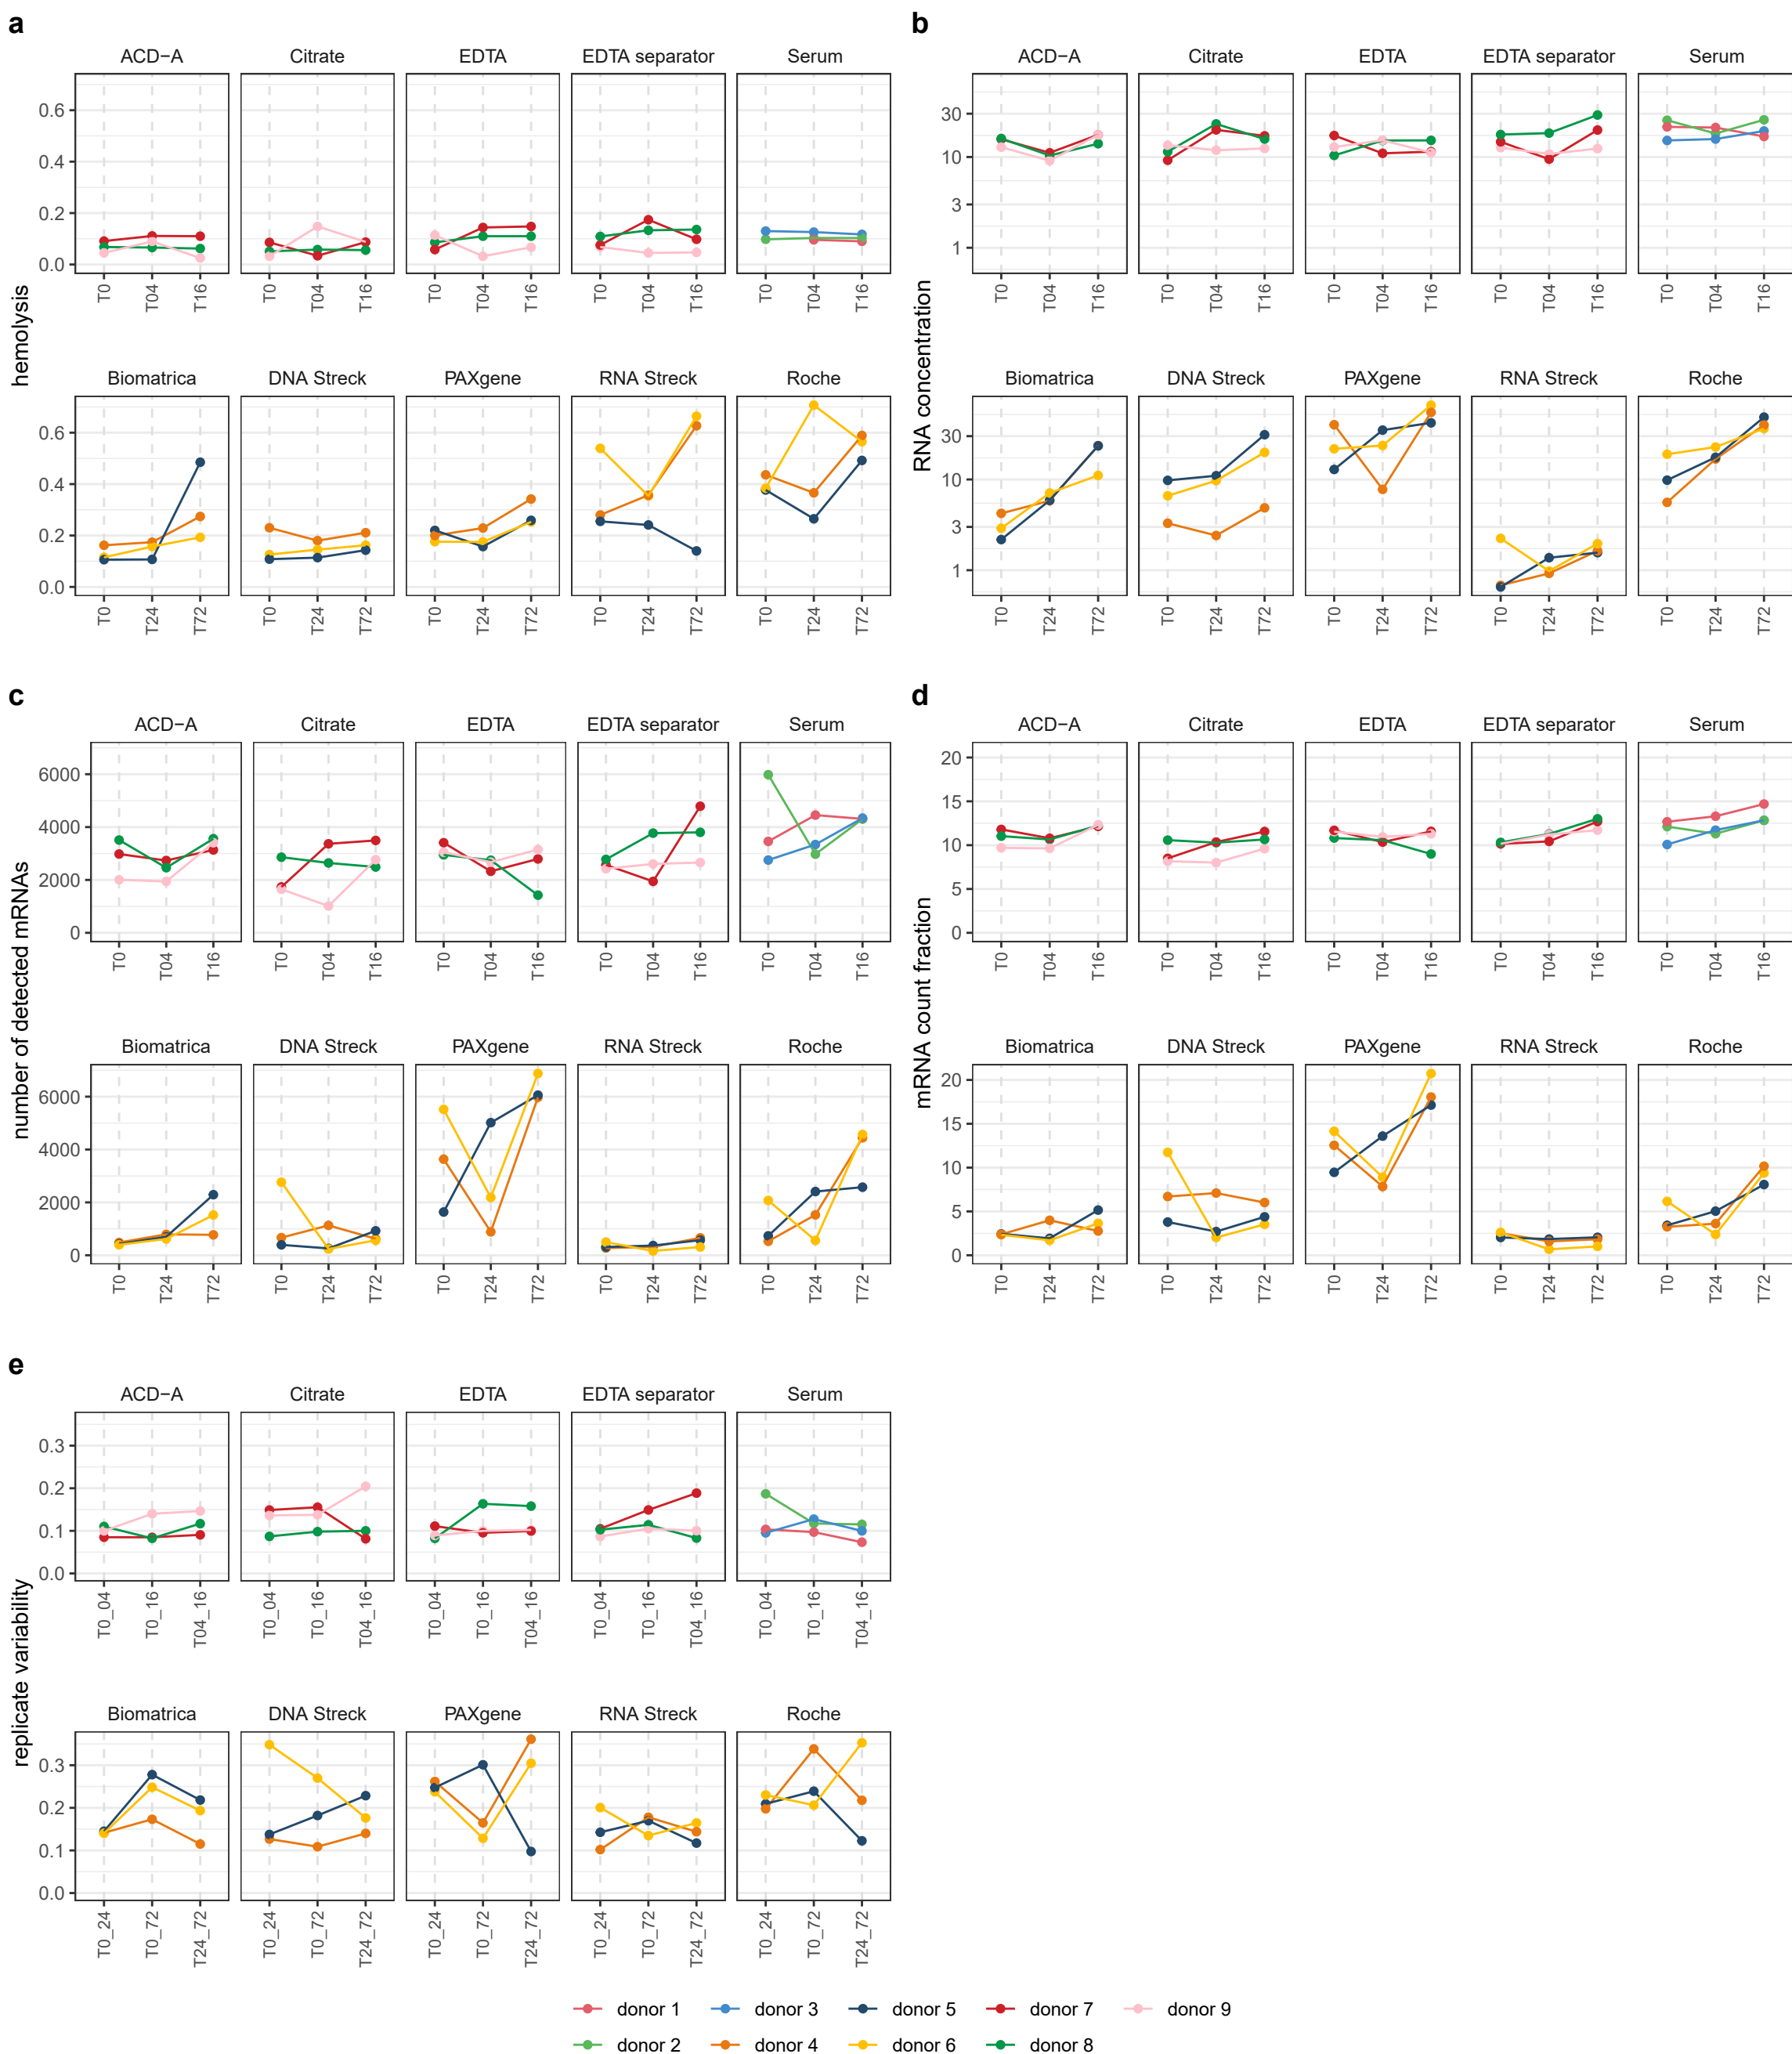

**Supplementary Fig. S6: Performance metrics of blood collection tubes over time at mRNA level.** Evolution of hemolysis in plasma (a), measured by absorbance at 414 nm with Nanodrop. Evolution of RNA concentration (b) calculated based on the number of endogenous counts vs Sequin spike-in RNA. Evolution of the number of detected mRNAs (c). Evolution of the fraction of counts mapping to mRNAs versus all counts (d). Evolution of the pairwise area left of the curve (replicate variability (e) performance metric). T0=plasma prepared immediately after blood draw. T04, T16, T24, T72=plasma prepared 4, 16, 24 and 72 hours after blood draw, respectively. Note that different donors were sampled and that tubes were processed at different time intervals for *preservation* and classic tubes.
