# Supplementary material for: Blood collection tube and RNA purification method recommendations for extracellular RNA transcriptome profiling: A large-scale pre-analytical variable performance evaluation
Source: Research Square preprint supplement (doi:10.21203/rs.3.rs-2409038/v2), 2024-07-22
Supplement: Supplementary file 17 [file fc599e302a685ff979942396.pdf]

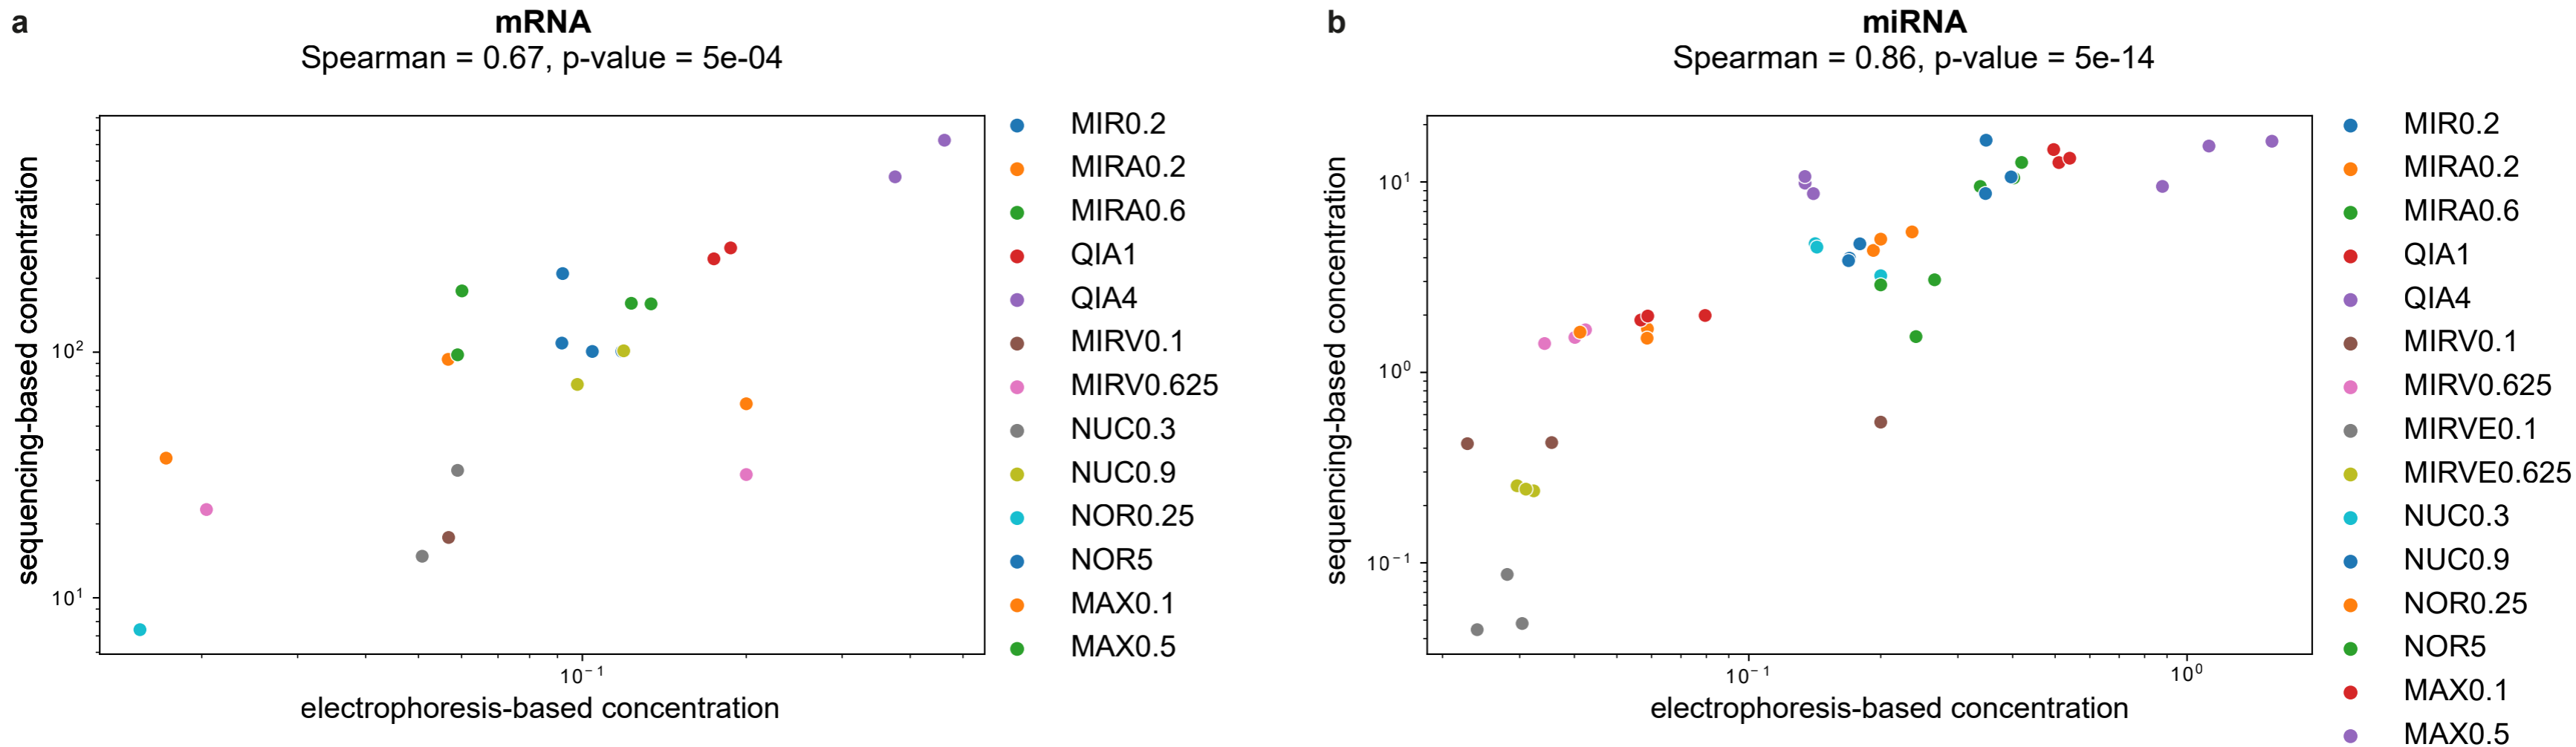

**Supplementary Fig. S2: Correlation between electrophoresis-based and sequencing-based eluate RNA concentrations.** Correlation between Femto Pulse eluate RNA concentrations (in ng/ $\mu$ l) and the endogenous mRNA vs ERCC ratios of the different RNA purification methods (a). Correlation between the Femto Pulse eluate RNA concentrations (in ng/ $\mu$ l) and the endogenous miRNA vs LP ratio of the different RNA purification methods (b). Axes are shown in logarithmic scale. The number in the RNA purification method labels is the plasma input volume (in ml). Spearman correlation coefficients and p-values are indicated (calculated using the `spearmanr` function (Scipy library) in Python). ERCC=Extracellular RNA Communication Consortium, LP=Library Preparation Control, MAX=Maxwell methods, MIR=miRNeasy method, MIRA=miRNeasy Advanced method, MIRV=mirVana method, MIRVE=mirVana method with purification protocol for small RNA enrichment, NOR=Norgen method, NUC=NucleoSpin method, QIA=QIAamp method.
